# Supplementary material for: Gene Set Enrichment Analysis Identifies LIF as a Negative Regulator of Human Th2 Cell Differentiation
Source: PubMed Central journal article supplement — Sci Rep. 2012 Jun 18;2:464. doi: 10.1038/srep00464 (PMC3376453; doi:10.1038/srep00464), 2012-06-18
Supplement: srep00464-s1.pdf [file srep00464-s1.pdf]

## Supplementary Data:

Title: Gene Set Enrichment Analysis Identifies LIF as a Negative Regulator of human Th2 Cell Differentiation

Authors: Ubaid Ullah, Parul Tripathi, Riitta Lahesmaa and Kanury VS Rao

## Supplementary Table IA

| Symbol   | BKL description                                                                                                                                                                                                                                                 |
|----------|-----------------------------------------------------------------------------------------------------------------------------------------------------------------------------------------------------------------------------------------------------------------|
| AIRE     | Autoimmune regulator; a transcription regulator; acts in hemopoiesis; downregulated in Omenn syndrome; acts as an autoantigen in Addison disease; thyroiditis; and premature menopause; gene mutations causes alopecia areata and polyendocrinopathies          |
| AK3      | Adenylate kinase 3; plays a role in nucleotide phosphorylation                                                                                                                                                                                                  |
| AK3L1    | Adenylate kinase 3-like 1; may be involved in energy metabolism and nucleotide phosphorylation                                                                                                                                                                  |
| ALOX5AP  | Arachidonate 5-lipoxygenase-activating protein; involved in leukotriene synthesis; decreased expression correlates with HIV infections; increased mRNA expression correlates with proteinuria associated with IgA and membranoproliferative glomerulonephritis  |
| ANG      | Angiogenin ribonuclease RNase A family 5; an antimicrobial protein that acts in angiogenesis; upregulated in anoxia; synovitis; amyotrophic lateral sclerosis; endometriosis; arterial occlusive diseases; Waldenstrom macroglobulinaemia; and several cancers  |
| ANTXR2   | Anthrax toxin receptor 2; binds to antigen moiety of anthrax toxin; may function in blood vessel development and female reproduction; gene mutations are associated with juvenile hyaline fibromatosis and infantile systemic hyalinosis                        |
| APOL6    | Apolipoprotein L6; a lipid binding protein that induces mitochondria-mediated apoptosis characterized by mitochondrial release of cytochrome c and activation of various caspases; contains a Bcl 2 homology (BH) 3 domain                                      |
| ARMC9    | Armadillo repeat containing 9 (melanomamelanocyte specific protein KU-MEL-1); a tumor antigen in melanoma; Vogt Koyanagi Harada disease; and some cancers including brain; esophageal; colon; and chronic myelogenous leukemia                                  |
| ASCL2    | Achaete-scute complex homolog 2; a putative transcription factor that plays a role in cell proliferation; may play a role in histone H3-K4 methylation and in utero embryonic development                                                                       |
| ATP8B4   | Protein with high similarity to aminophospholipid ATPase transporter (human ATP8B1); which is a predicted phospholipid-translocating ATPase that is associated with familial intrahepatic cholestasis in which there is impaired bile flow                      |
| BACE2    | Beta-site APP-cleaving enzyme 2; an aspartic-type protease that acts in APP processing; expression is upregulated in sporadic inclusion-body myositis; Down syndrome; liver-; breast-; and colon neoplasms; expression plays a role in Alzheimer                |
| BFSP1    | Beaded filament structural protein 1 (filensin); an intermediate filament protein specific to the lens; associates with phakinin (BFSP2) to form the beaded filament                                                                                            |
| BSPRY    | B-box and SPRY-domain containing (zotin-1); exhibits protein binding activity; a testis-specific member of the Ro-Ret family that contains a B-box and a SPRY domain and a 14-3-3 consensus interaction motif                                                   |
| C1orf21  | Protein of unknown function; has very strong similarity to uncharacterized mouse 1700025G04Rik                                                                                                                                                                  |
| C6orf173 | Chromosome 6 open reading frame 173 (cancer upregulated gene 2); a nuclear protein that may act as a transeption factor; cellular overexpression induces a cancer-specific; tumorigenic phenotype; increased expression is observed in multiple cancer types    |
| C8orf85  | Protein of unknown function; has high similarity to uncharacterized A5D3 protein (rat Aard); which may be involved in postnatal lung development and spermatogenesis                                                                                            |
| CABLES1  | Cdk5 and Abl enzyme substrate 1; regulates endometrial cell proliferation; decreased expression is associated with endometrial hyperplasia; loss of expression is associated with head and neck squamous cell carcinoma; lung cancer; and colon adenocarcinoma  |
| CBS      | Cystathionine-beta-synthase; binds to pyridoxal phosphate; plays a role in cysteine metabolic process; upregulated in Down syndrome; gene polymorphisms are associated with cardiovascular disease and homocystinuria                                           |
| CCR1     | Chemokine receptor-1; acts in G protein signaling; metastasis; and leukocyte chemotaxis; aberrant expression correlates with multiple sclerosis; hypersensitivity; hepatitis C and HIV infections; granulomatous and Alzheimer diseases; and Hodgkin lymphomas  |
| CCR8     | Chemokine receptor 8; a G protein-coupled receptor that elevates intracellular Ca2+ flux; functions in cell adhesion and chemotaxis; may play a role in antiapoptosis; aberrant expression correlates with asthma and pulmonary sarcoidosis                     |
| CD1C     | CD1c molecule; presents bacterial glycolipid and microbial lipid antigens to T cells; involved in cellular defense responses and cytokine production; decreased expression correlates with non-Hodgkin lymphoma; skin neoplasms; and melanoma                   |
| CD86     | CD86 antigen; a CD28 and CTLA-4 ligand; promotes IL-2 production and phosphatidylinositol-3-kinase activation; acts in T-cell costimulation; aberrant expression correlates with multiple sclerosis; asthma; Hodgkin disease; and inflammatory bowel disorders  |
| CHDH     | Choline dehydrogenase; involved in response to nutrient; may play a role in choline metabolic process; single nucleotide polymorphisms are associated with breast cancer risk                                                                                   |
| CHST2    | Carbohydrate sulfotransferase 2; catalyze the transfer of sulfate from 3-prime-phosphoadenosine 5-prime-phosphosulfate to position 6 of a nonreducing N-acetylglucosamine residue; aberrant mRNA expression correlates with colonic neoplasms and endometriosis |
| CLGN     | Calmeqin; a putative testis specific chaperone that may play a role in male infertility; may cause protein folding                                                                                                                                              |
| CLIC4    | Chloride intracellular channel 4; a putative actin binding protein that may play a role in apoptosis and maintenance of apical basal membrane polarity; gene expression is downregulated in ovary; breast; and kidney cancers                                   |
| CLIC6    | Chloride intracellular channel 6; a putative voltage-gated chloride channel protein that may play a role in chloride transport; expressed in the pancreas; placenta; liver and brain                                                                            |
| CLU      | Clusterin; a cholesterol transporter that acts in antiapoptosis; cytolysis; and cell adhesion; gene mutation causes nephrotic syndrome; mRNA is overexpressed in retinitis pigmentosa; mouse Clu is associated with chronic glomerular kidney disease           |
| CPNE2    | Protein with high similarity to copine III (human CPNE3); which is a member of the copine family of phospholipid binding proteins; may play a role in membrane trafficking; displays protein kinase activity; contains two C2 domain                            |
| CTNNA1   | Catenin alpha 1; an actin binding and bundling protein that binds to CDH1; CTNNB1; and JUP; may act in cell-cell adhesion; mutations in gene causes colon cancer; decreased mRNA level correlates with acute myeloid leukemia and myelodysplastic syndrome      |
| CXCR6    | Chemokine (C-X-C motif) receptor 6; a coreceptor that acts in cell-cell adhesion; cytokine production; I-kappaB kinase - NF-kappaB cascade; leukocyte chemotaxis; and regulation of cell adhesion mediated by integrin; upregulated in prostate cancer          |
| CYB5R2   | NAD(P)H-dependent cytochrome b5 reductase-like b5R.2; a putative cytochrome b5 reductase which contains consensus motifs for FAD and NAD(P)H binding                                                                                                            |
| DBN1     | Drebrin 1; an actin binding protein that may play a role in dendrite development; memory; and neuron differentiation; aberrant expression is associated with basal and squamous cell carcinoma; Alzheimer disease; and Down syndrome                            |
| DFNA5    | Deafness autosomal dominant 5; may play a role in caspase activation; cell proliferation; and cell cycle arrest; gene mutation causes non syndromic hearing loss; downregulated in breast and colorectal cancers; and melanoma                                  |
| DNAH14   | Dynein axonemal heavy polypeptide 14; a putative microtubule motor protein that may function in the movement of cilia and flagella                                                                                                                              |
| DPF3     | D4 zinc and double PHD fingers family member 3; a predicted transcription modulator that contains a d4 zinc-finger domain                                                                                                                                       |
| EAF2     | ELL associated factor 2; a transcriptional activator that plays a role in the induction of apoptosis; decreased mRNA expression correlates with prostate cancer                                                                                                 |
| ENTPD1   | Ectonucleoside triphosphate diphosphohydrolase 1; an ATPase that acts in cell adhesion; angiogenesis; and leukocyte chemotaxis; aberrant expression is associated with Hodgkin disease; B-cell leukemia; multiple sclerosis; pancreatitis; and HIV infections   |
| FAM110C  | Synthetic high osmolarity-sensitive 1 (by homology to C. albicans Sho1p); a predicted osmosensor in the HOG1 MAP kinase high-osmolarity signal transduction pathway                                                                                             |
| FAM40B   | Member of the N1221-like protein family; has strong similarity to uncharacterized mouse D330017J20RIK                                                                                                                                                           |
| FES      | Feline sarcoma oncogene; a protein tyrosine kinase that is involved in cytokine mediated signal transduction; myeloid cell differentiation; and macrophage differentiation; aberrant expression correlates with lung neoplasms and adenocarcinoma               |
| FGFR1    | Fibroblast growth factor receptor 1; a putative protein tyrosine kinase that acts in cell proliferation and skeletal development; protein expression is upregulated in Alzheimer disease and lung and various neoplasms; gene mutation causes Pfeiffer syndrome |

FGFR1 Fibroblast growth factor receptor-like 1; exhibits protein homodimerization activity; regulates cell adhesion; may be involved in regulation of cell differentiation and cell proliferation  
 FREQ Frequentin homolog; a calcium-binding protein that binds and modulates the activity of KV4 K<sup>+</sup> channels and regulates dopamine induced D2 receptor internalization and phosphorylation; overexpressed in schizophrenia and bipolar disorder  
 FURIN Furin (paired basic amino acid cleaving enzyme); acts in chemokine metabolism; overexpressed in oral tongue squamous cell carcinoma; increased activity correlates with cystic fibrosis; gene is aberrantly expressed in Alzheimer disease and breast neoplasm  
 FUT7 Fucosyltransferase 7 (alpha (1,3) fucosyltransferase); forms the sialyl Lewis x moiety and functions in the glycosylation of selectin ligands; increased expression may be associated with adenocarcinoma and lung neoplasms  
 GALNT3 polypeptide N-acetylgalactosaminyltransferase 3; acts in cell differentiation and is involved in response to chemical stimulus; aberrant expression correlates with several cancers; missense mutations in the gene cause familial tumoral calcinosis  
 GJB2 Connexin 26; a gap junction channel that acts in apoptosis; cell-cell signaling; and epidermis development; inhibits cell differentiation and growth; gene mutation is associated with deafness; Bart Pumphrey syndrome; and palmoplantar keratoderma  
 GNG4 Guanine nucleotide binding protein gamma 4; a putative GTPase that plays a role in the regulation of adenyl cyclase activity; may act in G protein-coupled receptor protein signaling pathway  
 GPR34 G protein-coupled receptor 34; a GPCR that binds lysophosphatidylserine to inhibit intracellular cAMP levels and stimulate ERK phosphorylation; likely positively regulates mast cell degranulation  
 GPR56 G protein-coupled receptor 56; a transcription activator that acts in cerebellum development; upregulated in esophageal cancer; gene mutations correlate with polymicrogyria and nervous system disorders; mouse Gpr56 is associated with neuronal ectopia  
 GPT2 Glutamic pyruvate transaminase 2; catalyzes the reversible transamination between alanine and 2-oxoglutarate to form pyruvate and glutamate; may play a role in gluconeogenesis and fatty acid metabolism  
 GZMB Granzyme B; functions in extracellular matrix remodeling via cleavage of vitronectin; fibronectin; and laminin; overexpressed in rheumatoid arthritis; leukemia; melanoma; Hepatitis B and C; Sjogren syndrome; mycosis fungoides; Hodgkin disease; and asthma  
 HES1 Hairly and enhancer of split 1; a transcriptional repressor that plays a role in Notch signaling pathway; neurogenesis; and organ development; regulates cell fate and apoptosis; gene is upregulated in meningioma; medulloblastoma; and Down syndrome  
 HIP1 Huntingtin interacting protein 1; acts in androgen receptor signaling; antiapoptosis; and actin cytoskeleton organization and biogenesis; upregulated in non Hodgkin and Hodgkin lymphomas and prostate and colon cancers  
 HS6ST1 Heparan sulfate 6-O-sulfotransferase 1; a putative plasma membrane associated protein that is involved in heparan sulfate proteoglycan biosynthetic process  
 IGKC Immunoglobulin kappa light chain constant region; a portion of the mature immunoglobulin molecule; likely plays a role in determining antigen binding specificity; associated with B cell chronic lymphocytic leukemia and amyloidosis upon mutation  
 IL10 Interleukin 10; regulates inflammatory response; aberrant expression is associated with diabetes; rheumatoid arthritis; HIV infections; pelvic inflammatory disease; psoriasis; graft versus host disease; and several neoplasms  
 IL12RB2 Interleukin 12 receptor beta 2; binds to SOCS3; mediates T cell differentiation; expression is increased in diabetes; multiple sclerosis; and tuberculoid leprosy; increased gene expression correlates with paraparesis; Crohn disease; and tuberculosis  
 IL2RA Interleukin 2 receptor alpha; plays a role in regulation of T cell mediated immune response; expression is altered in several neoplasms; immune system and inflammatory diseases; Parkinson disease; asthma; and type I diabetes mellitus  
 IL3RA Interleukin 3 receptor alpha; plays a role in cell proliferation and histamine release; may be involved in antiapoptosis and B-cell differentiation; aberrantly expressed in leukemia; HIV infection; atopic dermatitis; breast and skin neoplasms  
 ITGA1 Integrin alpha 1; binds to cell adhesion molecule; mediates matrix-cell adhesion; angiogenesis; cartilage development; and wound healing; aberrantly expressed in multiple sclerosis; female infertility; psoriasis; and rheumatoid arthritis; and many cancers  
 ITGAX Integrin alpha X; plays a role in B cell differentiation; aberrant protein expression is associated with rheumatoid arthritis; Crohn disease; granulomatous disease; leukemia; psoriasis; pyoderma gangrenosum; HIV infections; and multiple sclerosis  
 ITM2C Protein with strong similarity to integral membrane protein 2C (mouse Itm2c); which exhibits regulated expression in brain following treatment with the Chinese medicine Huang Lian Jie Du decoction; contains a BRICHOS domain  
 ITPKA Inositol 1 4 5 trisphosphate 3 kinase A; plays a role in inositol and derivative phosphorylation; may play a role in cellular calcium ion homeostasis; protein expression is downregulated in oral squamous cell carcinoma  
 JAKMIP1 Janus kinase and microtubule interacting protein 1; binds RNA; GABA receptors; Janus kinases; and microtubules; regulates microtubule bundle formation; abnormal expression in lymphoblastoid cells may correlate with autism spectrum disorders  
 KCNK1 Potassium channel subfamily K member 1; a disulfide-linked homodimeric channel that may control background K<sup>+</sup>-mediated membrane conductance; gene overexpression correlates with dementia associated with acquired immunodeficiency syndrome (AIDS)  
 KIAA1211 Protein of unknown function; has high similarity to uncharacterized mouse C530008M17Rik  
 KIF5C Kinesin family member 5C; interacts with GRIF1 and rat kinesin light chain (KLC); may play a role in microtubule-based movement  
 LAMB3 Laminin beta 3; plays a role in cell adhesion and in hemidesmosome formation; downregulation correlates with prostatic neoplasms; aberrant expression of mRNA correlates with adenocarcinoma and glioma; gene mutation causes junctional epidermolysis bullosa  
 LAT2 Linker for activation of T cells family member 2; a signal transducer that binds to GRB2; promotes mast cell degranulation; inhibits ERK phosphorylation and TNF and IL8 production; gene haploinsufficiency correlates with Williams syndrome  
 LIF Leukemia inhibitory factor; a transcription coactivator that activates MAPK activity and acts in stem cell expansion; ossification; inflammatory response; and antiapoptosis; upregulated in arthritis; arteriosclerosis; septic shock; and bone neoplasms  
 LMNB1 Lamin B1; a structural constituent of cytoskeleton that acts in chromosome and nuclear envelope organization; apoptosis; lung development; and ossification; acts as autoantigen in chronic fatigue syndrome; aberrantly expressed in colonic neoplasms  
 LONRF2 Protein containing four type 2 tetratricopeptide repeats; has moderate similarity to uncharacterized human LONRF3  
 LRP12 Low density lipoprotein-related protein 12; member of the LDLR superfamily; a putative cell surface receptor that may function in signaling pathways or endocytosis; upregulated expression may have a role in oral squamous cell carcinoma  
 LTK Leukocyte tyrosine kinase; binds to p85 subunit of phosphatidylinositol 3-kinase and regulates cell proliferation; mRNA expression is upregulated in acute myeloid leukemia; gene polymorphism is associated with systemic lupus erythematosus  
 LYN Homolog of v-yes-1 Yamaguchi sarcoma viral related oncogene; a protein tyrosine kinase that acts in apoptosis; cytokine-mediated signaling pathway; leukocyte chemotaxis; and phagocytosis; upregulated in squamous cell carcinoma and several other neoplasms  
 MAMLD1 Mastermind-like domain containing 1; exhibits transcription coactivator activity at the HES3 promoter; augments testosterone production; gene mutations cause isolated hypospadias of varying severity  
 MAP3K8 Mitogen activated protein kinase kinase kinase 8; a protein serine threonine kinase that plays a role in interleukin 1 beta production; regulates protein amino acid autophosphorylation; mRNA expression is upregulated in breast and stomach neoplasms  
 MCTP2 Multiple C2-domains with two transmembrane regions 2; contains three C2 domains which bind calcium but not phospholipids  
 MIAT Synthetic high osmolarity-sensitive 1 (by homology to C. albicans Sho1p); a predicted osmosensor in the HOG1 MAP kinase high-osmolarity signal transduction pathway  
 MYB Homolog of v-myb myeloblastosis viral oncogene; a transcription activator that mediates G1-S mitotic transition; erythrocyte differentiation; and regulation of myeloid cell differentiation; upregulated in breast and several other neoplasms  
 MYO1E Myosin IE; an ATPase that associates with actin and calmodulin; binds to rat Dnm1; rat Dnm2; and rat Dnm3; plays a role in receptor-mediated endocytosis; may be involved in actin filament based movement  
 MYOF Fer-1-like 3; binds to phospholipids; involved in myoblast fusion; endocytic recycling; and plasma membrane repair; activates protein phosphorylation and vascular permeability; regulates gene expression; mouse Fer113 is associated with muscular dystrophy  
 NANOS3 Nedd4 family interacting protein 2; binds to ubiquitin protein ligase NEDD4; may play a role in regulating EGFR trafficking; expression is regulated by a calcineurin-mediated pathway and is induced in activated T cells  
 NDFIP2 Naked cuticle homolog 2; a cytokine binding protein that mediates protein targeting to membrane; may inhibit Wnt receptor signaling; may play a role in cell fate determination; gene upregulation is associated with malignant peripheral nerve sheath tumors  
 NKD2 Natural killer cell group 7 sequence; may play a role in immune response and release of cytoplasmic granules from lymphocytes and neutrophils following target cell recognition; corresponding gene is downregulated in Sezary syndrome and mycosis fungoides  
 NKG7 Prolyl 4-hydroxylase alpha polypeptide II; exhibits protein heterodimerization activity; acts in peptidyl-proline hydroxylation; may play a role in blood vessel; cartilage; and kidney development; increased mRNA expression correlates with osteoarthritis  
 P4HA2 AIR carboxylase; a putative phosphoribosylaminoimidazole carboxylase and succinocarboxamide synthase; forms octamers; aberrant gene expression is associated with lung squamous cell carcinoma and acute lymphoblastic leukemia  
 PAICS Protocadherin 8; may play a role in cell-cell signaling and expressed in brain

PDE4A Phosphodiesterase 4A; an cAMP-specific phosphodiesterase that is sensitive to the antidepressant rolipram; acts in signal transduction; may regulate T cell proliferation

PDGFRB Platelet-derived growth factor receptor beta polypeptide; a protein-tyrosine kinase that acts in GPCR pathway and induces cell proliferation and metastasis; upregulated in several cancers; translocation correlates with myeloproliferative disorders

PFKFB4 6-phosphofructo-2-kinase-fructose-2,6-bisphosphatase 4; synthesizes and degrades fructose-2,6-bisphosphate and may be involved in the regulation of glycolysis; corresponding gene expression is upregulated in breast and colon malignant tumors

PHLDA1 Pleckstrin homology-like domain family A member 1; acts in ribosome biogenesis and apoptosis; downregulated in metastatic melanoma and upregulated in intractable epilepsy; mouse Phlda1 is associated with mouse model of atherosclerosis

PLA2G16 Phospholipase A2 group XVI; induces apoptosis; plays a role in the regulation of Ras GTPase activity; aberrant mRNA expression correlates with non small cell lung carcinoma and psoriasis

PLA2G4A Phospholipase A2 group IVA; plays a role in platelet activating factor biosynthetic process; gene is upregulated in Alzheimer disease and esophageal squamous cell carcinoma; gene polymorphism is associated with type 2 diabetes mellitus

POU2AF1 POU class 2 associating factor 1; a transcriptional coactivator that plays a role in the regulation of cell proliferation and transcription; decreased expression of mRNA correlates with Hodgkin's disease and lymphoma

PPFIBP1 PTPRF interacting protein binding protein 1; binds to alpha liprins and LAR family transmembrane protein tyrosine phosphatases; may play a role in cell adhesion

PRDM1 PR domain containing 1 with ZNF domain; a transcriptional repressor that acts in myeloid cell differentiation; placenta development; and T cell homeostasis; aberrant expression correlates with multiple myeloma; gene mutation causes B-cell lymphoma

RAB11FIP5 RAB11 family interacting protein 5; binds kinesin II to regulate endocytic protein recycling; also a component of a complex containing gamma SNAP (NAPG) and gamma tubulin; may act as an autoantigen in neonatal lupus erythematosus and Sjogren syndrome

RAB32 RAB32 member RAS oncogene family; a GTPase and an anchor protein that plays a role in mitochondrial membrane organization; hypermethylation of the corresponding gene is associated with colonic neoplasms and gastric and endometrial adenocarcinomas

RCAN2 Regulator of calcineurin 2; a phosphoprotein phosphatase inhibitor that acts in calcineurin-NFAT signaling pathway; learning; locomotory behavior; and cardiac muscle hypertrophy; negatively regulates T cell mediated cytotoxicity

RGSI8 Regulator of G protein signaling 18; interacts with heterotrimeric G protein G(i) and G(q) alpha subunits; attenuates signaling through G protein-coupled receptors; may be involved in megakaryocyte differentiation; platelet activation; and chemotaxis

RNF213 Protein containing a C3HC4 type (RING) zinc finger; which may mediate protein-protein interactions

RPL7L1 Protein containing a ribosomal L30p or L7e domain; has moderate similarity to ribosomal protein L7 (mouse RPL7); which is an RNA-binding putative ribosomal structural component that may play a role in protein biosynthesis

RUNX2 Runt-related transcription factor 2; acts in odontogenesis; upregulated in arteriosclerosis and calcinosis; gene mutation causes cleidocranial dysplasia; mouse Runx2 is associated with dysplasia; osteopenia; and diabetes

SETBP1 SET binding protein 1; may play a role in cell proliferation and regulation of protein binding; fusion of the corresponding gene with NUP98 gene correlates with T cell acute lymphoblastic leukemia

SHROOM1 Protein of unknown function; has high similarity to uncharacterized mouse Shroom1

SIGLECP3 Synthetic high osmolarity-sensitive 1 (by homology to C. albicans Sho1p); a predicted osmosensor in the HOG1 MAP kinase high-osmolarity signal transduction pathway

SLC27A2 Solute carrier family 27 (fatty acid transporter) member 2; a long-chain-fatty-acid-CoA ligase that is involved in peroxisomal beta oxidation; decreased protein activity correlates with X-linked adrenoleukodystrophy

SLC2A8 Solute carrier family 2 member 8; a glucose transporter that interacts with beta2 adaptin subunit of the AP 2 adaptor complex (AP2M1); acts in carbohydrate metabolism

SLC7A5 Solute carrier family 7 (cationic amino acid transporter y+ system) member 5; forms a heterodimer with SLC3A2; involved in leucine; tryptophan; organomercurial; and drug transport; overexpressed in lung carcinoma and in brain and colon neoplasms

SPIRE1 Spire homolog 1; sequesters four G-actin subunits to nucleate; sever; and cap filaments at their barbed ends

SPN Sialophorin; a transmembrane receptor that acts in MAPK cascade; cell adhesion; apoptosis; immunity; and chemotaxis; abnormally glycosylated in HIV infection; aberrantly expressed in Alzheimer disease; Wiskott-Aldrich syndrome; and several cancers

SPSB1 SplA-ryanodine receptor domain and SOCS box containing 1; binds the receptor tyrosine kinase MET and enhances hepatocyte growth factor (HGF)-induced transcriptional activity; tyrosine phosphorylated form binds p120RasGAP (RASA1)

TERT Telomerase reverse transcriptase; an RNA-directed DNA polymerase that functions in telomere maintenance; aging; DNA repair; and antiapoptosis; abnormal gene expression correlates with melanoma; neuroblastoma; and breast; lung; and other various cancers

TLX2 T-cell leukemia homeobox 2; a transcription activator that plays a role in peripheral nervous system and mesoderm development; gastrulation; and embryonic development; mouse Tlx2 gene deficiency causes myenteric neuronal hyperplasia and megacolon

TMEM163 Protein of unknown function; has strong similarity to uncharacterized mouse Tmem163

TMEM44 Protein of unknown function; has high similarity to uncharacterized mouse Tmem44

TNFRSF18 Tumor necrosis factor receptor superfamily member 18; plays a role in antiapoptosis; inhibits NK cell activation; and induces NF-kappaB transcription factor activity; increased expression correlates with rheumatoid arthritis and HIV infections

TNFRSF8 Tumor necrosis factor receptor superfamily member 8; acts in cell cycle and apoptosis; aberrantly expressed in arthritis; colitis; dermatitis; HIV; various cancers; sclerosis; hepatitis; asthma; thyroiditis; and Hodgkin; autoimmune; and celiac diseases

TPO Thyroid peroxidase; binds to heme; acts in T cell proliferation; increased expression of autoantibodies correlates with Turner syndrome; Hashimoto thyroiditis; depression; and sarcoidosis; abnormally expressed in thyroid cancer and Graves ophthalmopathy

TUBB6 Protein with strong similarity to beta-2 tubulin (rat Rgd1309427); which polymerizes to form microtubules and may act in axonal outgrowth and regeneration; contains a tubulin or FtsZ family GTPase domain and a tubulin or FtsZ family C-terminal domain

VDR Vitamin D receptor; a transcriptional regulator; upregulated in idiopathic hypercalciuria; gene mutations and polymorphisms are associated with rickets; AIDS; multiple sclerosis; diabetes; several cancers; colitis; Addison; Graves; and Crohn disease

ZBED2 Protein containing a BED zinc finger domain; has high similarity to uncharacterized human ZBED3

ZNF365 Zinc finger protein 365; a putative membrane protein that is expressed as four different alternative forms in various tissues; mutations in the corresponding gene are associated with uric acid nephrolithiasis

## Supplementary Table IB

| Gene symbol | BKL description                                                                                                                                                                                                                                                  |
|-------------|------------------------------------------------------------------------------------------------------------------------------------------------------------------------------------------------------------------------------------------------------------------|
| AGPAT5      | Protein with strong similarity to 1-acylglycerol-3-phosphate O-acyltransferase 5 (mouse Agpat5); which is an acyltransferase that is ubiquitously expressed; member of the phospholipid and glycerol acyltransferase family                                      |
| AiPL1       | Aryl hydrocarbon receptor interacting protein-like 1; interacts with NUB1; plays a role in protein farnesylation and visual perception; may regulate cell cycle; corresponding gene mutations and knock out of the mouse Aipl1 gene correlates with retinopathy  |
| AK5         | Adenylate kinase 5; a nucleotide kinase that plays a role in adenosine 5'-diphosphate biosynthetic process                                                                                                                                                       |
| APBA2       | Amyloid beta precursor protein binding family A member 2; inhibits translation; may mediate nervous system development; synaptic vesicle docking during exocytosis; and vesicle-mediated transport; aberrantly expressed in Alzheimer disease                    |
| ARHGEF10    | Rho guanine nucleotide exchange factor 10; a putative Rho-specific guanine-nucleotide exchange factor; may act in peripheral nerve myelination; gene mutation is associated with slowed nerve conductance and thin peripheral nerve myelination                  |
| ARID5A      | AT rich interactive domain 5A; an RNA polymerase II transcription factor that may regulate DNA dependent transcription                                                                                                                                           |
| ASXL3       | Additional sex combs like 3; a putative transcription regulator that may play a role in embryonic development and regulation of transcription from RNA polymerase II promoter                                                                                    |
| AXIN2       | Axin 2; involved in negative regulation of Wnt receptor signaling pathway; promotes odontogenesis; gene mutations are associated with hepatocellular carcinoma and colorectal and ovarian neoplasms; gene polymorphisms are associate with lung neoplasms        |
| BACH2       | BTB and CNC homology 1 basic leucine zipper transcription factor 2; plays a role in the negative regulation of cell proliferation and is involved in response to arsenic and drug; increased mRNA expression is associated with ovarian cancer                   |
| BMF         | BCL2 modifying factor; plays a role in B-cell homeostasis and in mammary epithelial anoikis and morphogenesis; regulates B-cell and thymocyte apoptosis; inhibits cell proliferation; genetic knockout in mouse Bmf is associated with B-cell hyperplasia        |
| C11orf35    | Protein of unknown function; has high similarity to uncharacterized mouse 1600016N20Rik                                                                                                                                                                          |
| C18orf55    | Protein of unknown function; has high similarity to uncharacterized mouse 1700034H14Rik                                                                                                                                                                          |
| C1orf107    | Protein with low similarity to rice Os05g0295100; which is involved in response to arsenic and anoxia                                                                                                                                                            |
| C1orf51     | Protein of unknown function; has high similarity to uncharacterized mouse Gm129                                                                                                                                                                                  |
| C1QTNF4     | Protein containing two C-terminal C1q domains; has a region of low similarity to a region of adipose most abundant gene transcript 1 (human ADIPOQ); which is involved in adipocyte differentiation and the regulation of energy balance and insulin sensitivity |
| C20orf165   | Protein of unknown function; has high similarity to uncharacterized mouse 1700020C07Rik                                                                                                                                                                          |
| C21orf105   | Synthetic high osmolarity-sensitive 1 (by homology to C. albicans Sho1p); a predicted osmosensor in the HOG1 MAP kinase high-osmolarity signal transduction pathway                                                                                              |
| C2orf15     | Protein of unknown function                                                                                                                                                                                                                                      |
| C3orf48     | Synthetic high osmolarity-sensitive 1 (by homology to C. albicans Sho1p); a predicted osmosensor in the HOG1 MAP kinase high-osmolarity signal transduction pathway                                                                                              |
| C6orf105    | Chromosome 6 open reading frame 105; may play a role in embryonic development; gene SNP analysis suggests a role in non syndromic oral clefts                                                                                                                    |
| CA7         | Protein with high similarity to carbonic anhydrase 2 (human CA2); which converts CO2 to bicarbonate and is associated with colitis; pancreatitis; biliary cirrhosis and carbonic anhydrase II deficiency; contains a eukaryotic-type carbonic anhydrase domain   |
| CALD1       | Caldesmon 1; a calmodulin binding protein that acts in actin cytoskeleton organization and biogenesis and cell growth; regulates cell shape and stress fiber formation; upregulated in glioma; gene polymorphism correlates with type I diabetes mellitus        |
| CAMK1D      | Calcium-calmodulin-dependent protein kinase ID; acts in phagocytosis; MAPK activation; and respiratory burst; mediates FMLP-induced reactive oxygen species production; neutrophil migration; and cell adhesion; may play a role in cellular defense response    |
| CAND1       | Cullin-associated and neddylation-dissociated 1; mediates cullin deneddylation; regulates protein complex assembly; inhibits ubiquitin ligase; may play a role in muscle development; gene maps to a locus associated with myopathic scapuloperoneal syndrome    |
| CDH23       | Cadherin 23; plays a role in auditory receptor cell differentiation; inner ear morphogenesis; sensory perception of sound; and visual perception; gene mutation causes deafness; retinitis pigmentosa; vestibular diseases; and multiple abnormalities           |
| CLEC4C      | C-type lectin domain family 4 member C; a sugar binding putative transmembrane receptor that mediates T-helper 1 type immune response; may play a role in antigen processing and presentation                                                                    |
| CPEB2       | Protein with very strong similarity to cytoplasmic polyadenylation element binding protein 2 (mouse Cpeb2); which is a RNA poly(U) binding protein that may regulate the translation of stored mRNAs during spermiogenesis; contains two RNA recognition motifs  |
| CTSL1       | Cathepsin L1; a cysteine type peptidase that plays a role in axonogenesis; B cell proliferation; extracellular matrix organization; steroid biosynthesis; and regulation of leukocyte migration; upregulated in atrophic gastritis; bone and several neoplasms   |
| CTSL3       | Synthetic high osmolarity-sensitive 1 (by homology to C. albicans Sho1p); a predicted osmosensor in the HOG1 MAP kinase high-osmolarity signal transduction pathway                                                                                              |
| CYP2C18     | Cytochrome P450 family 2 subfamily C polypeptide 18; a monooxygenase and retinoic acid 4-hydroxylase that plays a role in retinoid and xenobiotic metabolic process; upregulation of the corresponding gene is associated with sudden infant death syndrome      |
| CYSLTR2     | Cysteinyln leukotriene receptor 2; a G protein-coupled receptor that regulates calcium flux; blood pressure; and vascular permeability; overexpressed in colon cancer; gene mutation correlates with asthma; mouse Cysltr2 is associated with atherosclerosis    |
| DACT1       | Dapper antagonist of beta catenin homolog 1; a cytoplasmic protein that may play a role in Wnt receptor signaling pathway and in utero embryonic development                                                                                                     |

DDAH1 Dimethylarginine dimethylaminohydrolase 1; a catalytic enzyme that regulates asymmetric dimethylarginine proteolysis and AKT1 phosphorylation; decreased activity correlates with cytomegalovirus infections; gene polymorphisms correlate with pre-eclampsia

DDR1 Discoidin domain receptor tyrosine kinase 1; a collagen binding protein that plays a role in MAPKKK cascade; cell maturation; and cell motion; upregulated in churg-Strauss syndrome; increased mRNA expression correlates with non small cell lung carcinoma

DENND2A Protein with high similarity to suppression of tumorigenicity 5 (human ST5); which is involved in the regulation of MAPK and in maintaining contact-dependent growth; member of the DENN (AEX-3) domain family; contains uDENN and dDENN domains

DIO1 Deiodinase iodothyronine type I; acts in thyroid hormone generation; may play a role in maturation of prostate and inflammatory response; decreased activity correlates with euthyroid sick syndrome; mRNA is downregulated in papillary thyroid carcinomas

DLG2 Discs large homolog 2; plays a role in clustering of voltage-gated potassium channels; nitric oxide mediated signal transduction; and protein complex assembly; increased mRNA expression correlates with epilepsy

DLL1 Delta-like 1; mediates Notch signaling; regulates lymphocyte and osteoblast differentiation; inhibits T cell cytokine production and keratinocyte migration; gene upregulation is associated with Alzheimer disease; Down syndrome; and several carcinomas

DNAJA4 Protein with high similarity to dnaJ (Hsp40) homolog subfamily A member 4 (rat Dnaja4); which is a heat shock protein; member of the DnaJ central domain (4 repeats) family and the DnaJ C-terminal region family; contains a DnaJ domain

DNMT3L DNA (cytosine-5-)-methyltransferase 3-like; interacts and activates the de novo methyltransferases DNMT3A and DNMT3B and plays a role in DNA methylation; stimulates transferase activity; may play a role in genetic imprinting

DOPEY1 Member of the Dopey N-terminal domain containing family; has low similarity to *C. elegans* PAD-1; which is involved in embryogenesis and morphogenesis

DPEP2 Protein with high similarity to membrane-bound dipeptidase 2 (mouse Dpep2); which is a membrane dipeptidase catalyzing conversion of leukotriene-D4 to leukotriene-E4; member of the membrane dipeptidase (peptidase family M19) family

DSC1 Desmocollin 1; regulates intercellular adhesion; acts as an autoantigen in pemphigus; corresponding gene polymorphism is associated with susceptibility to Alzheimer disease; gene is aberrantly expressed in Netherton syndrome and colorectal adenocarcinoma

EDAR Ectodysplasin A receptor; plays a role in cell surface receptor linked signal transduction; gene mutation is associated with Hypohidrotic ectodermal dysplasia

EPHA1 EPH receptor A1; a transmembrane receptor protein tyrosine kinase that may play a role in embryonic development and cell proliferation and differentiation; decreased mRNA expression correlates with prostatic neoplasm

EPHX2 Epoxide hydrolase 2 cytoplasmic; a phosphoric ester hydrolase that acts in isoprenoid catabolic process; SNP is used to treat kidney transplantation; SNPs play roles in cardiovascular diseases and hyperlipoproteinemia type II

FAM117B Protein has high similarity to a region of mouse Glc1l; which is induced by the steroid drug dexamethasone; transfected androgen receptor or glucocorticoid receptor; may play a role in steroid-mediated apoptosis and T cell differentiation

FAM83F Member of the DUF1669 domain of unknown function family; which may be phospholipases; has high similarity to uncharacterized mouse MGC27770

FCGBP Fc fragment of IgG binding protein; may act in immune response; expression during rheumatoid arthritis and SLE correlates with the disease; aberrant mRNA expression is associated with anaplastic astrocytoma; and follicular thyroid adenomas and carcinomas

FLT1 Fms-related tyrosine kinase 1; a vascular endothelial growth factor receptor; acts in angiogenesis; ossification; response to hypoxia; cell phosphorylation; and proliferation; aberrantly expressed in menorrhagia; sclerosis; psoriasis; and several cancers

FMN1 Formin 1; a putative alpha-catenin binding protein that may be involved in embryonic limb morphogenesis

FSTL3 Follistatin-like 3; binds and inhibits activin; regulates osteoclast and erythrocyte differentiation; acts in gonadal development and function; aberrantly expressed in breast and endometrial cancers; gene translocation causes B-cell lymphoma and leukemia

FTCD Formiminotransferase cyclodeaminase; a metabolic bifunctional enzyme that promotes the association of Golgi complex with cytoskeleton; gene deletion causes inborn errors of amino acid metabolism; autoimmune antibody correlates with autoimmune hepatitis A

GDF9 Growth differentiation factor 9; acts in steroid biosynthetic process; female pregnancy; and antiapoptosis; regulates cell differentiation; transcription; and cell proliferation; downregulated in polycystic ovary syndrome

GPA33 Glycoprotein A33; a putative transmembrane receptor that may play a role in in utero embryonic development; antigen processing and presentation; and cell adhesion; gene is upregulated in Barrett metaplasia

hCG\_1774568

HGSNAT Heparan-alpha-glucosaminide N-acetyltransferase; an enzyme that exhibits heparan-alpha-glucosaminide N-acetyltransferase activity; a wide variety of mutations is associated with mucopolysaccharidosis IIIC; or Sanfilippo disease type C

HIST2H2BE Histone cluster 2 H2be; may bind to double-stranded DNA; may play a role in nucleosome assembly

HSPA12A Protein with very strong similarity to heat shock protein 12A (mouse Hspa12a); which exhibits upregulation in atherosclerotic lesions of the thoracic aorta

HSPG2 Heparan sulfate proteoglycan 2; a coreceptor that acts in angiogenesis; cartilage condensation; and ossification; regulates apoptosis and transcription; gene mutation causes Schwartz Jampel syndrome and Silverman-Handmaker type dyssegmental dysplasia

IFI44 Interferon-induced protein 44; an interferon-inducible protein; may mediate antiviral action of interferons; gene SNP correlates with response to therapeutic drugs for chronic hepatitis C; increased monocyte expression correlates with Sjogrens syndrome

IL1RL2 Interleukin 1 receptor-like 2; regulates I-kappaB kinase and NF-kappaB cascade and cell surface receptor linked signaling; may play a role in cellular defense and inflammatory response; gene is upregulated in psoriatic skin

IL7R Interleukin 7 receptor; acts in B cell differentiation; T cell receptor V(D)J recombination; and multicellular organismal development; single nucleotide polymorphism correlates with early onset form of type I diabetes mellitus and multiple sclerosis

IVNS1ABP Influenza virus NS1A binding protein; an alpha-enolase binding protein that plays a role in symbiosis; may be involved in transcription and RNA splicing

KDM2A F-box and leucine-rich repeat protein 11; a putative ubiquitin-protein ligase activity that may act in SCF-dependent proteasomal ubiquitin-dependent protein catabolism and protein modification

KIAA1543 Protein of unknown function; has strong similarity to uncharacterized mouse 2310057J16Rik

KIF27 Kinesin family member 27; a putative microtubule motor that may play a role in gamete generation and microtubule-based movement; gene haploinsufficiency is associated with myeloid leukemia

KLHL14 Protein containing six kelch 1 motifs and four kelch 2 motifs; has low similarity to human KLHL13; which is an ubiquitin ligase that plays a role in the regulation of cytokinesis and mitosis

KLHL3 Kelch-like 3; putative actin-binding protein that may play a role in cytoskeletal dynamics

KLRB1 Killer cell lectin-like receptor subfamily B member 1; a phospholipase activator that stimulates T cell proliferation; cytokine biosynthesis; and NK cell degranulation; aberrant expression causes Guillain-Barre syndrome; angina; sclerosis; and melanoma

KRT72 Keratin 72; a putative structural constituent of cytoskeleton that may play a role in hair follicle morphogenesis

KRT74 Keratin 74; a putative structural molecule that may play a role in the intermediate filament-based process

LCE1E Protein of unknown function

LGR4 Leucine-rich repeat-containing G protein-coupled receptor 4; regulates erythropoiesis and acts in eye development; upregulated in lymph node metastasis and colon carcinomas; mouse Lgr4 is associated with ocular anterior segment dysgenesis

LOC100128003

LOC100128180

LOC100129038

LOC100129196

LOC100130278

LOC100130924

LOC100131150

LOC100131929

LOC151878

LOC284454 Synthetic high osmolarity-sensitive 1 (by homology to C. albicans Sho1p); a predicted osmosensor in the HOG1 MAP kinase high-osmolarity signal transduction pathway

LOC642413 Synthetic high osmolarity-sensitive 1 (by homology to C. albicans Sho1p); a predicted osmosensor in the HOG1 MAP kinase high-osmolarity signal transduction pathway

LOC730257

LSR Lipolysis stimulated lipoprotein receptor; a protein targeted by p53 that may be involved in response to stress

LTC4S Leukotriene C4 synthase; a glutathione transferase that interacts with mGT; acts in leukotriene biosynthesis; upregulated in chronic myeloid leukemia; gene polymorphism correlates with asthma; gene overexpression is associated with sinusitis

LY9 Lymphocyte antigen 9; plays a role in the formation of immunological synapse and homophilic cell adhesion

MBNL3

MCF2L MCF.2 cell line derived transforming sequence-like; a guanyl-nucleotide exchange factor that induces JNK cascade; transcription; stress fiber formation; and GTPase activity; mediates protein localization and GPCR signaling

MPL Myeloproliferative leukemia virus oncogene; a putative transmembrane receptor that acts in JAK-STAT cascade and definitive hemopoiesis; downregulated in thrombocytopenia; polycythemia vera; and myeloproliferative disorders

MRPL43 Mitochondrial ribosomal protein L43; a putative structural constituent of the mitochondrial large ribosomal subunit; may function in protein biosynthesis and oxidative phosphorylation

MYCT1 Myc target 1; promotes apoptosis in gastric carcinoma cell lines; mRNA expression is decreased in gastric carcinoma

MYPN Myopalladin; an ANKRD1 binding protein that tethers nebulin and nebulin to alpha-actinin; maintains the sarcomere structure; may play a role in Z-line assembly; mutations in the corresponding gene are associated with idiopathic dilated cardiomyopathy

NELL2 NEL-like 2; may play a role in cell proliferation; nervous system development; signal transduction; and regulation of epidermal growth factor receptor activity; gene expression is upregulated in benign prostatic hyperplasia

NFIA Nuclear factor I-A; a transcriptional regulator that acts in brain development; neuron differentiation; and redox signal response

NLRP3 NLR family pyrin domain containing 3; acts in cell differentiation; regulates inflammatory response; interleukin secretion; caspase activity; and apoptosis; gene mutations is associated with Crohn syndrome; urticaria; and autoimmune disorders

NOG Noggin; inhibits chondrocyte proliferation; neuron differentiation; and ossification; gene mutation causes ankylosis; proximal symphalangism; and multiple synostoses syndrome; gene translocation is associated with myeloproliferative diseases

NPEPL1 Protein containing a cytosol aminopeptidase family catalytic domain; has moderate similarity to leucine aminopeptidase (C. elegans LAP-1); which is a putative aminopeptidase that acts in oviposition and in the regulation of development

NR1D2 Nuclear receptor subfamily 1 group D member 2; a transcriptional regulator that regulates striated muscle development; may be involved in tissue homeostasis and in regulation of neuronal synaptic plasticity

ODZ1 Odz odd Oz ten m homolog 1; a putative heparin binding signal transducer that may play a role in nervous system development and immune response; upregulation of the corresponding gene is associated with papillary thyroid carcinoma

OR51E2 Olfactory receptor family 51 subfamily E member 2; prostate specific GPCR; binds to GNA12 and mediates cytokine and chemokine mediated signaling; mRNA expression is upregulated in prostate intraepithelial neoplasia and early prostate tumors

OR8D1 Olfactory receptor family 8 subfamily D member 1; a putative G protein-coupled receptor that is expressed in the fetal tongue; may function in taste perception

PAX4 Paired box gene 4; a putative RNA polymerase II transcription factor; acts in positive regulation of cell proliferation; gene mutations are associated with ketosis prone diabetes and type 2 diabetes mellitus

PDE6B Phosphodiesterase 6B cGMP-specific rod beta; a 3'5'-cyclic-GMP phosphodiesterase that plays a role in circadian rhythm; phototransduction visible light; and retinal cell programmed cell death; gene mutations are associated with retinitis pigmentosa

PDZD2 PDZ domain containing 2; stimulates pancreatic progenitor cell proliferation; increased expression correlates with prostate neoplasms

PDZD3 Protein with high similarity to mouse Pdzd3; which binds to mouse Slc34a1 and interacts with Slc34a1 Trpv6 calcium channel to regulate calcium ion transport; contains three PDZ; DHR; or GLGF domains; which are found in signaling proteins

PHC3 Polyhomeotic like 3; associates with polycomb complex PRC-H components and the E2F6 transcription factor; may act in silencing target promoters in G(0); reduced protein expression and gene mutation is associated with osteosarcoma

PIWIL4 Piwi-like 2; a DICER binding protein that may play a role in RNA interference

POU2F1 POU domain class 2 transcription factor 1; a transcriptional regulator that interacts with nuclear hormone receptors; decreased expression correlates with prostatic neoplasms; gene polymorphism is associated with Alzheimer disease

PRKAG2 Protein kinase AMP-activated gamma 2 non-catalytic subunit; plays a role in glycogen metabolism and regulation of fatty acid oxidation and glucose import; gene mutation causes myocardial glycogen storage disease and Wolff-Parkinson-White syndrome

PRKCZ Protein kinase C zeta; a serine-threonine kinase; acts in hormone secretion; antiapoptosis; and cytokine-mediated signaling; aberrantly expressed in Alzheimer disease; amyotrophic lateral sclerosis; rheumatoid arthritis; psoriasis; and several cancers

RAB25 RAB25 member RAS oncogene family; associates with integrin to induce invasive cell migration; acts in the regulation of cell proliferation and apoptosis in cancer cells; increased expression is observed in breast; liver; and ovarian neoplasms

RBMS3 RNA binding motif single stranded interacting protein; increases the expression of transcription factor PRRX1 by binding and stabilizing its mRNA; increased mRNA expression is associated with liver fibrosis

RIN1 Ras and Rab interactor 1; an enzyme inhibitor that plays a role in endocytosis; DNA synthesis; and cell cell migration; gene amplification is associated with oral squamous cell carcinoma

RIN2 Ras and Rab interactor 2; a small GTPase regulator that is involved in protein homotetramerization; may act as a Ras effector to promote apoptosis and inhibits cell proliferation; decreased mRNA expression correlates with tumors

RIPK2 Receptor-interacting serine-threonine kinase 2; a signal transducer that acts in activation of MAPK activity; inflammatory response; and regulation of NF-kappaB transcription factor activity; increased mRNA expression correlates with multiple sclerosis

SBF2 SET binding factor 2; binds to the coiled coil region of MTMR2; may play a role in peripheral nervous system and eye development; nonsense mutation in the gene causes autosomal recessive form of Charcot-Marie-Tooth disease

SCML1 Sex comb on midleg-like 1 (Drosophila); a member of a family of D. melanogaster Polycomb group transcriptional repressors involved in development

SERPINF2 Serine proteinase inhibitor clade F member 2; inhibits plasmin mediated fibrinolysis; involved in blood coagulation; aberrant expression correlates with arteriosclerosis; coronary diseases; and brain ischemia; gene mutation causes hemorrhagic disorders

SESN1 Sestrin 1; may act in determination of left and right symmetry and regulation of cell proliferation; gene mutation may correlate with situs inversus

SH3PXD2B Protein containing a phosphoinositide-binding phox protein (PX) domain; a proline-rich peptide-binding Src homology 3 (SH3) domain; and a variant SH3 domain; has moderate similarity to mouse Sh3md1; which is likely involved in tyrosine kinase signaling

SLC22A23 Member of the major facilitator superfamily and sugar (and other) transporter family; has low similarity to mouse Slc22a3; which is a monoamine transporter that regulates neurotransmitter levels and behavior

SLC29A3 Solute carrier family 29 member 3; a broadly selective low affinity nucleoside transporter; gene mutation causes autosomal recessive H syndrome; and pigmented hypertrichotic dermatosis with insulin dependent diabetes syndrome

SNAI1 Snail homolog 1; a transcriptional repressor that plays a role in cell adhesion and induction of apoptosis by p53 in response to DNA damage; involved in epithelial to mesenchymal transition; upregulated in breast neoplasms and thyroid carcinoma

SOD2 Superoxide dismutase 2 mitochondrial; acts in superoxide metabolism; aging; antiapoptosis; and DNA double-strand break repair; aberrantly expressed in asthma; atherosclerosis; schizophrenia; pancreatitis; and colorectal and several neoplasms

SOX12 SRY (sex determining region Y)-box 12; a transcriptional activator that forms a ternary complex with Brn2 (POU3F2) and DNA; may play roles in both differentiation and maintenance of several cell types

SPON1 Spondin 1 extracellular matrix protein; binds to and inhibits the processing of beta-amyloid precursor protein; acts in activation of protein kinase activity; regulates angiogenesis; cell migration; neuron differentiation; and transcription

STMN3 Stathmin-like 3; may play a role in nervous system development

SUSD4 Protein containing two sushi or short consensus repeat (SCR) domains; which are found in complement and adhesion proteins

TAS1R1 Taste receptor type 1 member 1; a G protein-coupled receptor that is involved in elevation of cytosolic calcium ion concentration and sensory perception of taste

TBC1D4 TBC1 domain family member 4; a Rab GTPase activator that plays a role in glucose metabolic process; may regulate small GTPase mediated signal transduction; upregulated in atopic dermatitis and impaired phosphorylation correlates with type 2 diabetes

TCP11L2 Protein with moderate similarity to T-complex protein 11 (mouse Tcp11); which is involved in acrosome reaction and may mediate cell surface receptor linked signal transduction

|           |                                                                                                                                                                                                                                                                  |
|-----------|------------------------------------------------------------------------------------------------------------------------------------------------------------------------------------------------------------------------------------------------------------------|
| TES       | Testis derived transcript (3 LIM domains); plays a role in regulation of cell proliferation and apoptosis; decreased mRNA expression correlates with breast and prostatic neoplasms                                                                              |
| TMEM100   | Protein of unknown function; has strong similarity to uncharacterized mouse 1810057C19Rik                                                                                                                                                                        |
| TNFRSF10B | Death receptor 5; a caspase activator that mediates induction of apoptosis; mitochondrial membrane potential; and NF-kappaB transcription factor activity; aberrant expression correlates with arthritis; HIV infection; pancreatitis; and several neoplasms     |
| TRIM9     | Protein with very strong similarity to rat Trim9; which may inhibit calcium ion dependent exocytosis; member of the SPRY domain containing family; contains a C3HC4 type zinc finger; a fibronectin type III; and two B-box zinc finger domains                  |
| TSPAN6    | Tetraspanin 6; may be involved in cell adhesion; cell migration; and cell proliferation                                                                                                                                                                          |
| TTC16     | Protein containing seven tetratricopeptide repeats; which may act in protein binding; has a region of weak similarity to a region of <i>S. cerevisiae</i> Srp40p; which is a suppressor of <i>S. cerevisiae</i> Rpc40p and <i>S. cerevisiae</i> Rpb10p mutations |
| TTC18     | Protein containing seven type 2 tetratricopeptide repeats and seven type 1 tetratricopeptide repeats; which may mediate protein-protein interactions                                                                                                             |
| TTN       | Titin; an actin filament binding protein that acts in muscle development; regulates autolysis; acts as an autoantigen in melanoma associated retinopathy and myasthenia gravis; gene mutation is associated with dilated cardiomyopathy and muscular dystrophy   |
| UBQLNL    | Protein containing a ubiquitin family domain; has moderate similarity to ubiquilin 1 (human UBQLN1); which accumulates PSEN1 and PSEN2 and is associated with neurofibrillary tangles and Lewy bodies observed in Alzheimer and Parkinson disease                |
| ULBP2     | UL16 binding protein 2; binds to KLRK1; acts in immune response; regulates T cell proliferation; natural killer cell mediated cytotoxicity; and IFN-gamma production; overexpressed in T-cell non-Hodgkin lymphoma and acute and chronic myelogenous leukemia    |
| UNQ5814   |                                                                                                                                                                                                                                                                  |
| VIPR1     | Vasoactive intestinal peptide receptor 1; a GPCR that activates adenylyl cyclase; acts in cell proliferation and inflammatory response; mRNA is upregulated in prostate neoplasms; map position correlates with small cell carcinoma                             |
| YPEL2     | Yippee-like 2; a putative zinc binding protein; may be involved in the cell cycle; member of the yippee putative zinc-binding protein family; gene polymorphism correlates with risk associated with breast cancer                                               |
| ZBTB40    | Zinc finger and BTB domain containing 40; a predicted transcription factor; gene locus may be associated with bone mineral density and fractures                                                                                                                 |
| ZNF238    | Zinc finger protein 238; a transcriptional repressor that may be involved in brain development and function                                                                                                                                                      |
| ZNF415    | Zinc finger protein 415; inhibits AP1 and TP53 mediated transcriptional activity; five isoforms are observed which result from alternate mRNA splicing                                                                                                           |
| ZNF540    | Zinc finger protein 540; binds the MAP kinase scaffold protein; MVP; likely functions as a transcriptional repressor in the MAPK signaling pathway to mediate cellular functions                                                                                 |



## Supplementary Table II

### JAK\_STAT Signaling

| NAME   | PROBE  | GENE SYMBOL | GENE_TITLE                                                                         | RANK | METRIC SCORE | RUNNING ES | CORE ENRICH |
|--------|--------|-------------|------------------------------------------------------------------------------------|------|--------------|------------|-------------|
| row_0  | GPR56  | GPR56       | G protein-coupled receptor 56                                                      | 14   | 1.989099979  | 0.28498083 | Yes         |
| row_1  | CCR5   | CCR5        | chemokine (C-C motif) receptor 5                                                   | 266  | 0.76279974   | 0.36097574 | Yes         |
| row_2  | LPHN2  | LPHN2       | latrophilin 2                                                                      | 297  | 0.732099891  | 0.46249688 | Yes         |
| row_3  | CXCR3  | CXCR3       | chemokine (C-X-C motif) receptor 3                                                 | 457  | 0.610599995  | 0.52901024 | Yes         |
| row_4  | CCR3   | CCR3        | chemokine (C-C motif) receptor 3                                                   | 909  | 0.411400318  | 0.52721685 | Yes         |
| row_5  | LGR6   | LGR6        | leucine-rich repeat-containing G protein-coupled receptor 6                        | 996  | 0.387300014  | 0.571419   | Yes         |
| row_6  | F2R    | F2R         | coagulation factor II (thrombin) receptor                                          | 1543 | 0.274299979  | 0.5369762  | Yes         |
| row_7  | CCR2   | CCR2        | chemokine (C-C motif) receptor 2                                                   | 1550 | 0.27270031   | 0.5754932  | Yes         |
| row_8  | GPR17  | GPR17       | G protein-coupled receptor 17                                                      | 2226 | 0.168500066  | 0.508307   | No          |
| row_9  | EDG1   | EDG1        | endothelial differentiation, sphingolipid G-protein-coupled receptor, 1            | 3332 | 0.038999915  | 0.36416218 | No          |
| row_10 | LTB4R2 | LTB4R2      | leukotriene B4 receptor 2                                                          | 3924 | -0.023000002 | 0.28737637 | No          |
| row_11 | GPR135 | GPR135      | G protein-coupled receptor 135                                                     | 4298 | -0.0625      | 0.24583474 | No          |
| row_12 | EBI2   | EBI2        | Epstein-Barr virus induced gene 2 (lymphocyte-specific G protein-coupled receptor) | 4860 | -0.121200085 | 0.18727799 | No          |
| row_13 | CIDEB  | CIDEB       | cell death-inducing DFFA-like effector b                                           | 5028 | -0.137899876 | 0.18453176 | No          |
| row_14 | EMR3   | EMR3        | egf-like module containing, mucin-like, hormone receptor-like 3                    | 5645 | -0.217899978 | 0.13246697 | No          |
| row_15 | GPR132 | GPR132      | G protein-coupled receptor 132                                                     | 5713 | -0.227099985 | 0.15613948 | No          |
| row_16 | P2RY11 | P2RY11      | purinergic receptor P2Y, G-protein coupled, 11                                     | 5780 | -0.234499931 | 0.18101476 | No          |
| row_17 | RLN3R1 | null        | null                                                                               | 5974 | -0.261700034 | 0.19259965 | No          |

### PC12 Cell Differentiation

| NAME  | PROBE  | GENE SYMBOL | GENE_TITLE                                                             | RANK | METRIC SCORE | RUNNING ES | CORE ENRICH |
|-------|--------|-------------|------------------------------------------------------------------------|------|--------------|------------|-------------|
| row_0 | EGR1   | EGR1        | early growth response 1                                                | 0    | 4.485800266  | 0.41217282 | Yes         |
| row_1 | EGR2   | EGR2        | early growth response 2 (Krox-20 homolog, Drosophila)                  | 23   | 1.801800251  | 0.57474744 | Yes         |
| row_2 | EGR3   | EGR3        | early growth response 3                                                | 157  | 0.973499775  | 0.6461698  | Yes         |
| row_3 | JUN    | JUN         | jun oncogene                                                           | 279  | 0.751000166  | 0.6987745  | Yes         |
| row_4 | FRS2   | FRS2        | fibroblast growth factor receptor substrate 2                          | 1923 | 0.212300062  | 0.49559242 | No          |
| row_5 | CREB1  | CREB1       | cAMP responsive element binding protein 1                              | 2029 | 0.195600033  | 0.4993334  | No          |
| row_6 | GNAQ   | GNAQ        | guanine nucleotide binding protein (G protein), q polypeptide          | 2044 | 0.194500029  | 0.5153073  | No          |
| row_7 | CREBBP | CREBBP      | CREB binding protein (Rubinstein-Taybi syndrome)                       | 2460 | 0.137700081  | 0.4717114  | No          |
| row_8 | PTPN11 | PTPN11      | protein tyrosine phosphatase, non-receptor type 11 (Noonan syndrome 1) | 3224 | 0.050500035  | 0.37293598 | No          |
| row_9 | MAPK1  | MAPK1       | mitogen-activated protein kinase 1                                     | 3491 | 0.022300005  | 0.33893186 | No          |

|        |          |          |                                                          |      |              |              |    |
|--------|----------|----------|----------------------------------------------------------|------|--------------|--------------|----|
| row_10 | TERF2IP  | TERF2IP  | telomeric repeat binding factor 2, interacting protein   | 3620 | 0.00849998   | 0.322364     | No |
| row_11 | MAPK8    | MAPK8    | mitogen-activated protein kinase 8                       | 4350 | -0.067499995 | 0.2297589    | No |
| row_12 | RPS6KA3  | RPS6KA3  | ribosomal protein S6 kinase, 90kDa, polypeptide 3        | 4428 | -0.075500011 | 0.22625971   | No |
| row_13 | TH       | TH       | tyrosine hydroxylase                                     | 4470 | -0.07889998  | 0.22795229   | No |
| row_14 | SH2B     | null     | null                                                     | 5467 | -0.190900087 | 0.110497005  | No |
| row_15 | PIK3CA   | PIK3CA   | phosphoinositide-3-kinase, catalytic, alpha polypeptide  | 6124 | -0.290400028 | 0.04826711   | No |
| row_16 | MAPK8IP3 | MAPK8IP3 | mitogen-activated protein kinase 8 interacting protein 3 | 7146 | -0.654299974 | -0.029997637 | No |
| row_17 | MAP2K7   | MAP2K7   | mitogen-activated protein kinase kinase 7                | 7185 | -0.692299962 | 0.028463133  | No |

### Cytokine Cytokine Receptor Interaction

| NAME   | PROBE    | GENE SYMBOL | GENE_TITLE                                                                              | RANK | METRIC SCORE | RUNNING ES  | CORE ENRICH |
|--------|----------|-------------|-----------------------------------------------------------------------------------------|------|--------------|-------------|-------------|
| row_0  | PDGFRB   | PDGFRB      | platelet-derived growth factor receptor, beta polypeptide                               | 2    | 2.545100212  | 0.051106997 | Yes         |
| row_1  | TPO      | TPO         | thyroid peroxidase                                                                      | 6    | 2.168400049  | 0.09447238  | Yes         |
| row_2  | CCR8     | CCR8        | chemokine (C-C motif) receptor 8                                                        | 17   | 1.955800295  | 0.13258833  | Yes         |
| row_3  | IL2RA    | IL2RA       | interleukin 2 receptor, alpha                                                           | 28   | 1.689100266  | 0.16532013  | Yes         |
| row_4  | TNFRSF18 | TNFRSF18    | tumor necrosis factor receptor superfamily, member 18                                   | 34   | 1.622200012  | 0.19738525  | Yes         |
| row_5  | IL3RA    | IL3RA       | interleukin 3 receptor, alpha (low affinity)                                            | 36   | 1.584900141  | 0.22924449  | Yes         |
| row_6  | IL12RB2  | IL12RB2     | interleukin 12 receptor, beta 2                                                         | 45   | 1.465599775  | 0.25773782  | Yes         |
| row_7  | IL10     | IL10        | interleukin 10                                                                          | 72   | 1.297500134  | 0.2803755   | Yes         |
| row_8  | TNFRSF8  | TNFRSF8     | tumor necrosis factor receptor superfamily, member 8                                    | 86   | 1.221700191  | 0.30326107  | Yes         |
| row_9  | CCR1     | CCR1        | chemokine (C-C motif) receptor 1                                                        | 89   | 1.211400032  | 0.3274433   | Yes         |
| row_10 | CXCL2    | CXCL2       | chemokine (C-X-C motif) ligand 2                                                        | 134  | 1.034999847  | 0.34231958  | Yes         |
| row_11 | LIF      | LIF         | leukemia inhibitory factor (cholinergic differentiation factor)                         | 136  | 1.028100014  | 0.3629381   | Yes         |
| row_12 | OSM      | OSM         | oncostatin M                                                                            | 151  | 0.982999802  | 0.38086802  | Yes         |
| row_13 | IL26     | IL26        | interleukin 26                                                                          | 179  | 0.922600031  | 0.3958004   | Yes         |
| row_14 | FLT1     | FLT1        | fms-related tyrosine kinase 1 (vascular endothelial growth factor/vascular permeability | 193  | 0.878499985  | 0.41175747  | Yes         |
| row_15 | PRL      | PRL         | prolactin                                                                               | 226  | 0.814800024  | 0.4238297   | Yes         |
| row_16 | CCR5     | CCR5        | chemokine (C-C motif) receptor 5                                                        | 266  | 0.76279974   | 0.4338947   | Yes         |
| row_17 | IFNG     | IFNG        | interferon, gamma                                                                       | 290  | 0.740600109  | 0.44570002  | Yes         |
| row_18 | IL5      | IL5         | interleukin 5 (colony-stimulating factor, eosinophil)                                   | 323  | 0.710299969  | 0.4556626   | Yes         |
| row_19 | IFNAR2   | IFNAR2      | interferon (alpha, beta and omega) receptor 2                                           | 339  | 0.698800087  | 0.4677183   | Yes         |
| row_20 | CXCR3    | CXCR3       | chemokine (C-X-C motif) receptor 3                                                      | 457  | 0.610599995  | 0.46404183  | Yes         |
| row_21 | IL17RB   | IL17RB      | interleukin 17 receptor B                                                               | 478  | 0.592899799  | 0.4732757   | Yes         |
| row_22 | IL1RAP   | IL1RAP      | interleukin 1 receptor accessory protein                                                | 484  | 0.586699963  | 0.48443612  | Yes         |

|        |           |           |                                                                        |      |              |             |     |
|--------|-----------|-----------|------------------------------------------------------------------------|------|--------------|-------------|-----|
| row_23 | CSF2      | CSF2      | colony stimulating factor 2 (granulocyte-macrophage)                   | 532  | 0.561500072  | 0.48934302  | Yes |
| row_24 | ACVR2B    | ACVR2B    | activin A receptor, type IIB                                           | 574  | 0.540700018  | 0.4946507   | Yes |
| row_25 | TNFRSF4   | TNFRSF4   | tumor necrosis factor receptor superfamily, member 4                   | 650  | 0.506300211  | 0.49461338  | Yes |
| row_26 | CXCL3     | CXCL3     | chemokine (C-X-C motif) ligand 3                                       | 676  | 0.49029994   | 0.5010921   | Yes |
| row_27 | CCL5      | CCL5      | chemokine (C-C motif) ligand 5                                         | 757  | 0.455900192  | 0.49935338  | No  |
| row_28 | CCR3      | CCR3      | chemokine (C-C motif) receptor 3                                       | 909  | 0.411400318  | 0.48700494  | No  |
| row_29 | TNFSF10   | TNFSF10   | tumor necrosis factor (ligand) superfamily, member 10                  | 1025 | 0.378100157  | 0.4789083   | No  |
| row_30 | IL9R      | IL9R      | interleukin 9 receptor                                                 | 1026 | 0.37770009   | 0.48653334  | No  |
| row_31 | TNFRSF11A | TNFRSF11A | tumor necrosis factor receptor superfamily, member 11a, NFKB activator | 1049 | 0.373399973  | 0.49106237  | No  |
| row_32 | IFNA7     | IFNA7     | interferon, alpha 7                                                    | 1073 | 0.367000103  | 0.49532545  | No  |
| row_33 | IL18RAP   | IL18RAP   | interleukin 18 receptor accessory protein                              | 1329 | 0.310900211  | 0.46672297  | No  |
| row_34 | TNFRSF13C | TNFRSF13C | tumor necrosis factor receptor superfamily, member 13C                 | 1449 | 0.290199995  | 0.45630467  | No  |
| row_35 | CCR2      | CCR2      | chemokine (C-C motif) receptor 2                                       | 1550 | 0.27270031   | 0.44813195  | No  |
| row_36 | CXCL16    | CXCL16    | chemokine (C-X-C motif) ligand 16                                      | 1672 | 0.251000047  | 0.43664873  | No  |
| row_37 | CCL28     | CCL28     | chemokine (C-C motif) ligand 28                                        | 1761 | 0.237900019  | 0.4294148   | No  |
| row_38 | IL2RB     | IL2RB     | interleukin 2 receptor, beta                                           | 1809 | 0.23029995   | 0.42763546  | No  |
| row_39 | IL13      | IL13      | interleukin 13                                                         | 2027 | 0.195899963  | 0.401909    | No  |
| row_40 | IL15      | IL15      | interleukin 15                                                         | 2493 | 0.133000135  | 0.3409912   | No  |
| row_41 | TNFRSF21  | TNFRSF21  | tumor necrosis factor receptor superfamily, member 21                  | 2511 | 0.131299973  | 0.34131664  | No  |
| row_42 | EPOR      | EPOR      | erythropoietin receptor                                                | 2519 | 0.130200028  | 0.34298766  | No  |
| row_43 | CXCL12    | CXCL12    | chemokine (C-X-C motif) ligand 12 (stromal cell-derived factor 1)      | 2758 | 0.102300048  | 0.3124992   | No  |
| row_44 | TNFSF11   | TNFSF11   | tumor necrosis factor (ligand) superfamily, member 11                  | 2954 | 0.078600049  | 0.28741384  | No  |
| row_45 | GH1       | GH1       | growth hormone 1                                                       | 3054 | 0.067300081  | 0.27523127  | No  |
| row_46 | IL10RB    | IL10RB    | interleukin 10 receptor, beta                                          | 3102 | 0.06280005   | 0.2700704   | No  |
| row_47 | TNFRSF6B  | TNFRSF6B  | tumor necrosis factor receptor superfamily, member 6b, decoy           | 3181 | 0.055199862  | 0.26051593  | No  |
| row_48 | IL15RA    | IL15RA    | interleukin 15 receptor, alpha                                         | 3198 | 0.054199934  | 0.25942162  | No  |
| row_49 | CX3CR1    | CX3CR1    | chemokine (C-X3-C motif) receptor 1                                    | 3327 | 0.039400011  | 0.24270917  | No  |
| row_50 | IL28A     | IL28A     | interleukin 28A (interferon, lambda 2)                                 | 3334 | 0.038800001  | 0.24267179  | No  |
| row_51 | TGFBR2    | TGFBR2    | transforming growth factor, beta receptor II (70/80kDa)                | 3508 | 0.020799875  | 0.21942873  | No  |
| row_52 | IL18R1    | IL18R1    | interleukin 18 receptor 1                                              | 3515 | 0.019600034  | 0.21900374  | No  |
| row_53 | IL21R     | IL21R     | interleukin 21 receptor                                                | 3891 | -0.019400001 | 0.1681028   | No  |
| row_54 | IL2       | IL2       | interleukin 2                                                          | 4049 | -0.035700083 | 0.14734903  | No  |
| row_55 | IL22      | IL22      | interleukin 22                                                         | 4554 | -0.087500036 | 0.08017827  | No  |
| row_56 | TNFSF9    | TNFSF9    | tumor necrosis factor (ligand) superfamily, member 9                   | 4687 | -0.103600025 | 0.064214766 | No  |

|        |           |           |                                                                      |      |              |              |    |
|--------|-----------|-----------|----------------------------------------------------------------------|------|--------------|--------------|----|
| row_57 | AMH       | AMH       | anti-Mullerian hormone                                               | 5252 | -0.163100004 | -0.009636593 | No |
| row_58 | ACVR1     | ACVR1     | activin A receptor, type I                                           | 5573 | -0.206700087 | -0.049233384 | No |
| row_59 | IL4       | IL4       | interleukin 4                                                        | 5734 | -0.229899883 | -0.06647699  | No |
| row_60 | IL23A     | IL23A     | interleukin 23, alpha subunit p19                                    | 5914 | -0.253000021 | -0.08585307  | No |
| row_61 | TNFRSF1B  | TNFRSF1B  | tumor necrosis factor receptor superfamily, member 1B                | 5958 | -0.259200096 | -0.08650188  | No |
| row_62 | IL2RG     | IL2RG     | interleukin 2 receptor, gamma (severe combined immunodeficiency)     | 6175 | -0.299700022 | -0.10999605  | No |
| row_63 | TGFB3     | TGFB3     | transforming growth factor, beta 3                                   | 6299 | -0.32679987  | -0.12022257  | No |
| row_64 | TNFSF13   | TNFSF13   | tumor necrosis factor (ligand) superfamily, member 13                | 6376 | -0.341899872 | -0.12371558  | No |
| row_65 | FAS       | FAS       | Fas (TNF receptor superfamily, member 6)                             | 6390 | -0.345500112 | -0.118518755 | No |
| row_66 | TNFRSF25  | TNFRSF25  | tumor necrosis factor receptor superfamily, member 25                | 6403 | -0.348399997 | -0.113126606 | No |
| row_67 | IL6       | IL6       | interleukin 6 (interferon, beta 2)                                   | 6532 | -0.3829      | -0.12290447  | No |
| row_68 | CCL15     | CCL15     | chemokine (C-C motif) ligand 15                                      | 6646 | -0.411800027 | -0.1300472   | No |
| row_69 | CCL18     | CCL18     | chemokine (C-C motif) ligand 18 (pulmonary and activation-regulated) | 6719 | -0.432299852 | -0.1311681   | No |
| row_70 | CCL21     | CCL21     | chemokine (C-C motif) ligand 21                                      | 6783 | -0.449800014 | -0.13070467  | No |
| row_71 | IL12RB1   | IL12RB1   | interleukin 12 receptor, beta 1                                      | 6784 | -0.449800134 | -0.1216241   | No |
| row_72 | TNFSF14   | TNFSF14   | tumor necrosis factor (ligand) superfamily, member 14                | 6894 | -0.490799904 | -0.12662485  | No |
| row_73 | IL6ST     | IL6ST     | interleukin 6 signal transducer (gp130, oncostatin M receptor)       | 6938 | -0.507499933 | -0.12226097  | No |
| row_74 | CCL24     | CCL24     | chemokine (C-C motif) ligand 24                                      | 6964 | -0.522700012 | -0.1151282   | No |
| row_75 | CXCR4     | CXCR4     | chemokine (C-X-C motif) receptor 4                                   | 6967 | -0.524100065 | -0.10482121  | No |
| row_76 | IL24      | IL24      | interleukin 24                                                       | 7058 | -0.576299906 | -0.10549707  | No |
| row_77 | IL11RA    | IL11RA    | interleukin 11 receptor, alpha                                       | 7123 | -0.63530004  | -0.10142554  | No |
| row_78 | TNFSF8    | TNFSF8    | tumor necrosis factor (ligand) superfamily, member 8                 | 7198 | -0.710200012 | -0.09720974  | No |
| row_79 | GH2       | GH2       | growth hormone 2                                                     | 7234 | -0.767799973 | -0.08649668  | No |
| row_80 | CCR4      | CCR4      | chemokine (C-C motif) receptor 4                                     | 7250 | -0.803500056 | -0.0723273   | No |
| row_81 | IL7R      | IL7R      | interleukin 7 receptor                                               | 7257 | -0.814399958 | -0.05670685  | No |
| row_82 | TNFRSF10B | TNFRSF10B | tumor necrosis factor receptor superfamily, member 10b               | 7355 | -1.212500095 | -0.045496542 | No |
| row_83 | CCL25     | CCL25     | chemokine (C-C motif) ligand 25                                      | 7357 | -1.236400008 | -0.020672845 | No |
| row_84 | LTA       | LTA       | lymphotoxin alpha (TNF superfamily, member 1)                        | 7363 | -1.274699926 | 0.004376934  | No |

#### Folate Biosynthesis

| NAME  | PROBE  | GENE SYMBOL | GENE_TITLE                                                        | RANK | METRIC SCORE | RUNNING ES | CORE ENRICH |
|-------|--------|-------------|-------------------------------------------------------------------|------|--------------|------------|-------------|
| row_0 | RAD54L | RAD54L      | RAD54-like ( <i>S. cerevisiae</i> )                               | 291  | 0.740299702  | 0.11139614 | Yes         |
| row_1 | DHFR   | DHFR        | dihydrofolate reductase                                           | 402  | 0.651299953  | 0.22919883 | Yes         |
| row_2 | GGH    | GGH         | gamma-glutamyl hydrolase (conjugase, folylpolyglutamyl hydrolase) | 559  | 0.548299789  | 0.31977546 | Yes         |

|        |         |         |                                                                                       |      |              |            |     |
|--------|---------|---------|---------------------------------------------------------------------------------------|------|--------------|------------|-----|
| row_3  | RAD54B  | RAD54B  | RAD54 homolog B (S. cerevisiae)                                                       | 806  | 0.440899968  | 0.37626344 | Yes |
| row_4  | DDX52   | DDX52   | DEAD (Asp-Glu-Ala-Asp) box polypeptide 52                                             | 953  | 0.397400022  | 0.4374466  | Yes |
| row_5  | ALPP    | ALPP    | alkaline phosphatase, placental (Regan isozyme)                                       | 1273 | 0.32249999   | 0.45990944 | Yes |
| row_6  | SMARCA5 | SMARCA5 | SWI/SNF related, matrix associated, actin dependent regulator of chromatin, subfamily | 1357 | 0.307500064  | 0.5113157  | Yes |
| row_7  | DDX4    | DDX4    | DEAD (Asp-Glu-Ala-Asp) box polypeptide 4                                              | 1417 | 0.295000076  | 0.563429   | Yes |
| row_8  | PTS     | PTS     | 6-pyruvoyltetrahydropterin synthase                                                   | 1618 | 0.2597       | 0.5892305  | Yes |
| row_9  | EP400   | EP400   | E1A binding protein p400                                                              | 1741 | 0.240400076  | 0.6216754  | Yes |
| row_10 | RUVBL2  | RUVBL2  | RuvB-like 2 (E. coli)                                                                 | 1762 | 0.237900019  | 0.6674413  | Yes |
| row_11 | NUDT5   | NUDT5   | nudix (nucleoside diphosphate linked moiety X)-type motif 5                           | 2668 | 0.111799955  | 0.5675114  | No  |
| row_12 | DDX18   | DDX18   | DEAD (Asp-Glu-Ala-Asp) box polypeptide 18                                             | 2791 | 0.098800063  | 0.57110184 | No  |
| row_13 | ENTPD7  | ENTPD7  | ectonucleoside triphosphate diphosphohydrolase 7                                      | 2982 | 0.075500011  | 0.5607241  | No  |
| row_14 | NUDT8   | NUDT8   | nudix (nucleoside diphosphate linked moiety X)-type motif 8                           | 3310 | 0.040900052  | 0.5247195  | No  |
| row_15 | ATP13A2 | ATP13A2 | ATPase type 13A2                                                                      | 3357 | 0.036000013  | 0.52581805 | No  |
| row_16 | SKIV2L2 | SKIV2L2 | superkiller viralicidic activity 2-like 2 (S. cerevisiae)                             | 3397 | 0.031899929  | 0.5270303  | No  |
| row_17 | QDPR    | QDPR    | quinoid dihydropteridine reductase                                                    | 3599 | 0.010699987  | 0.5019564  | No  |
| row_18 | FPGS    | FPGS    | folylpolyglutamate synthase                                                           | 3766 | -0.007200003 | 0.4809151  | No  |
| row_19 | DDX23   | DDX23   | DEAD (Asp-Glu-Ala-Asp) box polypeptide 23                                             | 3840 | -0.015300035 | 0.47413456 | No  |
| row_20 | ASCC3   | ASCC3   | activating signal cointegrator 1 complex subunit 3                                    | 4067 | -0.038100004 | 0.45125428 | No  |

### Hematopoietic Cell Lineage

| NAME   | PROBE | GENE SYMBOL | GENE_TITLE                                                                      | RANK | METRIC SCORE | RUNNING ES  | CORE ENRICH |
|--------|-------|-------------|---------------------------------------------------------------------------------|------|--------------|-------------|-------------|
| row_0  | TPO   | TPO         | thyroid peroxidase                                                              | 6    | 2.168400049  | 0.110117525 | Yes         |
| row_1  | IL2RA | IL2RA       | interleukin 2 receptor, alpha                                                   | 28   | 1.689100266  | 0.19367692  | Yes         |
| row_2  | IL3RA | IL3RA       | interleukin 3 receptor, alpha (low affinity)                                    | 36   | 1.584900141  | 0.27380747  | Yes         |
| row_3  | CD1C  | CD1C        | CD1c molecule                                                                   | 80   | 1.249600053  | 0.33189383  | Yes         |
| row_4  | ITGA3 | ITGA3       | integrin, alpha 3 (antigen CD49C, alpha 3 subunit of VLA-3 receptor)            | 178  | 0.925000191  | 0.36603814  | Yes         |
| row_5  | ANPEP | ANPEP       | alanyl (membrane) aminopeptidase (aminopeptidase N, aminopeptidase M, microsoma | 265  | 0.763699889  | 0.39342487  | Yes         |
| row_6  | IL5   | IL5         | interleukin 5 (colony-stimulating factor, eosinophil)                           | 323  | 0.710299969  | 0.42201942  | Yes         |
| row_7  | CD38  | CD38        | CD38 molecule                                                                   | 391  | 0.657099962  | 0.4465338   | Yes         |
| row_8  | CSF2  | CSF2        | colony stimulating factor 2 (granulocyte-macrophage)                            | 532  | 0.561500072  | 0.4562403   | Yes         |
| row_9  | CD59  | CD59        | CD59 molecule, complement regulatory protein                                    | 603  | 0.527500153  | 0.47371694  | Yes         |
| row_10 | TFRC  | TFRC        | transferrin receptor (p90, CD71)                                                | 608  | 0.52579999   | 0.50007284  | Yes         |
| row_11 | CD1A  | CD1A        | CD1a molecule                                                                   | 643  | 0.510400057  | 0.5215653   | Yes         |
| row_12 | ITGA4 | ITGA4       | integrin, alpha 4 (antigen CD49D, alpha 4 subunit of VLA-4 receptor)            | 675  | 0.491600037  | 0.5425036   | Yes         |

|        |          |          |                                                                                  |      |              |              |     |
|--------|----------|----------|----------------------------------------------------------------------------------|------|--------------|--------------|-----|
| row_13 | CD9      | CD9      | CD9 molecule                                                                     | 736  | 0.463400006  | 0.55805945   | Yes |
| row_14 | HLA-DRA  | HLA-DRA  | major histocompatibility complex, class II, DR alpha                             | 792  | 0.443900108  | 0.573297     | Yes |
| row_15 | IL9R     | IL9R     | interleukin 9 receptor                                                           | 1026 | 0.37770009   | 0.5609664    | No  |
| row_16 | EPOR     | EPOR     | erythropoietin receptor                                                          | 2519 | 0.130200028  | 0.3649374    | No  |
| row_17 | CD8A     | CD8A     | CD8a molecule                                                                    | 2596 | 0.120700002  | 0.36078757   | No  |
| row_18 | CD33     | CD33     | CD33 molecule                                                                    | 2635 | 0.116600037  | 0.36159036   | No  |
| row_19 | HLA-DRB1 | HLA-DRB1 | major histocompatibility complex, class II, DR beta 1                            | 3238 | 0.049399853  | 0.28233522   | No  |
| row_20 | ITGAM    | ITGAM    | integrin, alpha M (complement component 3 receptor 3 subunit)                    | 3427 | 0.029599667  | 0.25830948   | No  |
| row_21 | CD19     | CD19     | CD19 molecule                                                                    | 4926 | -0.128100157 | 0.06135798   | No  |
| row_22 | HLA-DRB5 | HLA-DRB5 | major histocompatibility complex, class II, DR beta 5                            | 5387 | -0.180099964 | 0.008080157  | No  |
| row_23 | CR2      | CR2      | complement component (3d/Epstein Barr virus) receptor 2                          | 5395 | -0.181999922 | 0.016440088  | No  |
| row_24 | CD44     | CD44     | CD44 molecule (Indian blood group)                                               | 5401 | -0.182500005 | 0.025097305  | No  |
| row_25 | IL4      | IL4      | interleukin 4                                                                    | 5734 | -0.229899883 | -0.008243873 | No  |
| row_26 | ITGA2B   | ITGA2B   | integrin, alpha 2b (platelet glycoprotein IIb of IIb/IIIa complex, antigen CD41) | 5988 | -0.264400005 | -0.029087828 | No  |
| row_27 | FCGR1A   | FCGR1A   | Fc fragment of IgG, high affinity Ia, receptor (CD64)                            | 6462 | -0.36259985  | -0.074795246 | No  |
| row_28 | ITGA6    | ITGA6    | integrin, alpha 6                                                                | 6499 | -0.372299969 | -0.06063949  | No  |
| row_29 | IL6      | IL6      | interleukin 6 (interferon, beta 2)                                               | 6532 | -0.3829      | -0.04539804  | No  |
| row_30 | CD3E     | CD3E     | CD3e molecule, epsilon (CD3-TCR complex)                                         | 6538 | -0.384499788 | -0.026406769 | No  |
| row_31 | ITGA5    | ITGA5    | integrin, alpha 5 (fibronectin receptor, alpha polypeptide)                      | 7003 | -0.547999978 | -0.06140669  | No  |
| row_32 | IL11RA   | IL11RA   | interleukin 11 receptor, alpha                                                   | 7123 | -0.63530004  | -0.045071818 | No  |
| row_33 | CD37     | CD37     | CD37 molecule                                                                    | 7241 | -0.783599973 | -0.020878403 | No  |
| row_34 | IL7R     | IL7R     | interleukin 7 receptor                                                           | 7257 | -0.814399958 | 0.018747514  | No  |

#### DNA Replication Reactome

| NAME  | PROBE  | GENE SYMBOL | GENE_TITLE                                                  | RANK | METRIC SCORE | RUNNING ES  | CORE ENRICH |
|-------|--------|-------------|-------------------------------------------------------------|------|--------------|-------------|-------------|
| row_0 | RFC2   | RFC2        | replication factor C (activator 1) 2, 40kDa                 | 383  | 0.663499951  | 0.027988456 | Yes         |
| row_1 | CDC6   | CDC6        | CDC6 cell division cycle 6 homolog (S. cerevisiae)          | 460  | 0.608300209  | 0.091015846 | Yes         |
| row_2 | PRIM2A | PRIM2A      | primase, polypeptide 2A, 58kDa                              | 618  | 0.519799948  | 0.13237086  | Yes         |
| row_3 | GMNN   | GMNN        | geminin, DNA replication inhibitor                          | 654  | 0.502799988  | 0.18824534  | Yes         |
| row_4 | CDC45L | CDC45L      | CDC45 cell division cycle 45-like (S. cerevisiae)           | 720  | 0.473199844  | 0.2364762   | Yes         |
| row_5 | MCM4   | MCM4        | MCM4 minichromosome maintenance deficient 4 (S. cerevisiae) | 947  | 0.398399983  | 0.25382152  | Yes         |
| row_6 | ORC6L  | ORC6L       | origin recognition complex, subunit 6 like (yeast)          | 955  | 0.396399975  | 0.300669    | Yes         |
| row_7 | POLE2  | POLE2       | polymerase (DNA directed), epsilon 2 (p59 subunit)          | 1162 | 0.346600056  | 0.31448457  | Yes         |
| row_8 | RFC3   | RFC3        | replication factor C (activator 1) 3, 38kDa                 | 1197 | 0.338000059  | 0.35062316  | Yes         |

|        |       |       |                                                                                     |      |              |            |     |
|--------|-------|-------|-------------------------------------------------------------------------------------|------|--------------|------------|-----|
| row_9  | POLA2 | POLA2 | polymerase (DNA directed), alpha 2 (70kD subunit)                                   | 1280 | 0.32130003   | 0.378229   | Yes |
| row_10 | RFC4  | RFC4  | replication factor C (activator 1) 4, 37kDa                                         | 1319 | 0.31280005   | 0.4107857  | Yes |
| row_11 | CDK2  | CDK2  | cyclin-dependent kinase 2                                                           | 1387 | 0.300500035  | 0.43792066 | Yes |
| row_12 | CDC7  | CDC7  | CDC7 cell division cycle 7 (S. cerevisiae)                                          | 1529 | 0.276799917  | 0.45214757 | Yes |
| row_13 | MCM10 | MCM10 | MCM10 minichromosome maintenance deficient 10 (S. cerevisiae)                       | 1612 | 0.260700226  | 0.47244623 | Yes |
| row_14 | PCNA  | PCNA  | proliferating cell nuclear antigen                                                  | 1825 | 0.227400064  | 0.4710737  | Yes |
| row_15 | MCM2  | MCM2  | MCM2 minichromosome maintenance deficient 2, mitotin (S. cerevisiae)                | 1854 | 0.222599983  | 0.49411216 | Yes |
| row_16 | RPA2  | RPA2  | replication protein A2, 32kDa                                                       | 1879 | 0.219099879  | 0.5172718  | Yes |
| row_17 | POLD1 | POLD1 | polymerase (DNA directed), delta 1, catalytic subunit 125kDa                        | 1936 | 0.210400105  | 0.53503644 | Yes |
| row_18 | RFC5  | RFC5  | replication factor C (activator 1) 5, 36.5kDa                                       | 2008 | 0.198600054  | 0.54934096 | Yes |
| row_19 | MCM6  | MCM6  | MCM6 minichromosome maintenance deficient 6 (MIS5 homolog, S. pombe) (S. cere)      | 2128 | 0.183300018  | 0.5552815  | Yes |
| row_20 | MCM5  | MCM5  | MCM5 minichromosome maintenance deficient 5, cell division cycle 46 (S. cerevisiae) | 2295 | 0.159100056  | 0.5519208  | Yes |
| row_21 | POLA  | null  | null                                                                                | 2372 | 0.150200129  | 0.5597101  | Yes |
| row_22 | ORC1L | ORC1L | origin recognition complex, subunit 1-like (yeast)                                  | 2518 | 0.130399942  | 0.5557408  | No  |
| row_23 | CDT1  | CDT1  | chromatin licensing and DNA replication factor 1                                    | 2685 | 0.110000134  | 0.5464595  | No  |
| row_24 | MCM3  | MCM3  | MCM3 minichromosome maintenance deficient 3 (S. cerevisiae)                         | 2750 | 0.10289979   | 0.55017513 | No  |
| row_25 | PRIM1 | PRIM1 | primase, polypeptide 1, 49kDa                                                       | 2895 | 0.086400032  | 0.54103607 | No  |
| row_26 | POLD3 | POLD3 | polymerase (DNA-directed), delta 3, accessory subunit                               | 2943 | 0.080300093  | 0.5443354  | No  |
| row_27 | POLE  | POLE  | polymerase (DNA directed), epsilon                                                  | 3846 | -0.015700102 | 0.42372414 | No  |
| row_28 | ORC4L | ORC4L | origin recognition complex, subunit 4-like (yeast)                                  | 4031 | -0.034100056 | 0.40284616 | No  |
| row_29 | ORC2L | ORC2L | origin recognition complex, subunit 2-like (yeast)                                  | 4497 | -0.081200004 | 0.3494837  | No  |
| row_30 | POLD2 | POLD2 | polymerase (DNA directed), delta 2, regulatory subunit 50kDa                        | 4635 | -0.096599817 | 0.3425252  | No  |
| row_31 | RPA1  | RPA1  | replication protein A1, 70kDa                                                       | 4927 | -0.128200054 | 0.31846175 | No  |
| row_32 | UBA52 | UBA52 | ubiquitin A-52 residue ribosomal protein fusion product 1                           | 5024 | -0.137600005 | 0.3220155  | No  |

#### Valine Leucine Isoleucine Degradation

| NAME  | PROBE | GENE SYMBOL | GENE_TITLE                                                                        | RANK | METRIC SCORE | RUNNING ES | CORE ENRICH |
|-------|-------|-------------|-----------------------------------------------------------------------------------|------|--------------|------------|-------------|
| row_0 | ALDH2 | ALDH2       | aldehyde dehydrogenase 2 family (mitochondrial)                                   | 168  | 0.944400012  | 0.15727271 | Yes         |
| row_1 | BCAT1 | BCAT1       | branched chain aminotransferase 1, cytosolic                                      | 191  | 0.886600018  | 0.3233123  | Yes         |
| row_2 | ACADM | ACADM       | acyl-Coenzyme A dehydrogenase, C-4 to C-12 straight chain                         | 482  | 0.588400006  | 0.39618394 | Yes         |
| row_3 | AUH   | AUH         | AU RNA binding protein/enoyl-Coenzyme A hydratase                                 | 733  | 0.465499878  | 0.4510467  | Yes         |
| row_4 | OXCT1 | OXCT1       | 3-oxoacid CoA transferase 1                                                       | 999  | 0.387199998  | 0.48894963 | Yes         |
| row_5 | ACAT2 | ACAT2       | acetyl-Coenzyme A acetyltransferase 2 (acetoacetyl Coenzyme A thiolase)           | 1200 | 0.337000012  | 0.5260912  | Yes         |
| row_6 | ACAA2 | ACAA2       | acetyl-Coenzyme A acyltransferase 2 (mitochondrial 3-oxoacyl-Coenzyme A thiolase) | 1613 | 0.260400057  | 0.51989967 | Yes         |

|        |         |         |                                                                                      |      |              |            |     |
|--------|---------|---------|--------------------------------------------------------------------------------------|------|--------------|------------|-----|
| row_7  | ACAT1   | ACAT1   | acetyl-Coenzyme A acetyltransferase 1 (acetoacetyl Coenzyme A thiolase)              | 1632 | 0.257800102  | 0.5666072  | Yes |
| row_8  | PCCB    | PCCB    | propionyl Coenzyme A carboxylase, beta polypeptide                                   | 1671 | 0.251099944  | 0.609327   | Yes |
| row_9  | HMGCS1  | HMGCS1  | 3-hydroxy-3-methylglutaryl-Coenzyme A synthase 1 (soluble)                           | 1770 | 0.235199988  | 0.6408845  | Yes |
| row_10 | HADHA   | HADHA   | hydroxyacyl-Coenzyme A dehydrogenase/3-ketoacyl-Coenzyme A thiolase/enoyl-Coer       | 2748 | 0.103199959  | 0.52815574 | No  |
| row_11 | HIBCH   | HIBCH   | 3-hydroxyisobutyryl-Coenzyme A hydrolase                                             | 3229 | 0.050300002  | 0.47269547 | No  |
| row_12 | ECHS1   | ECHS1   | enoyl Coenzyme A hydratase, short chain, 1, mitochondrial                            | 3272 | 0.044799984  | 0.47554427 | No  |
| row_13 | IVD     | IVD     | isovaleryl Coenzyme A dehydrogenase                                                  | 3438 | 0.029000044  | 0.4587121  | No  |
| row_14 | BCAT2   | BCAT2   | branched chain aminotransferase 2, mitochondrial                                     | 3440 | 0.028700113  | 0.46404794 | No  |
| row_15 | BCKDHB  | BCKDHB  | branched chain keto acid dehydrogenase E1, beta polypeptide (maple syrup urine disea | 4697 | -0.104199886 | 0.3136998  | No  |
| row_16 | HSD17B4 | HSD17B4 | hydroxysteroid (17-beta) dehydrogenase 4                                             | 6017 | -0.271700144 | 0.1867461  | No  |

#### Prostaglandin Leukotriene Metabolism

| NAME   | PROBE   | GENE SYMBOL | GENE_TITLE                                                                  | RANK | METRIC SCORE | RUNNING ES | CORE ENRICH |
|--------|---------|-------------|-----------------------------------------------------------------------------|------|--------------|------------|-------------|
| row_0  | TPO     | TPO         | thyroid peroxidase                                                          | 6    | 2.168400049  | 0.31950608 | Yes         |
| row_1  | ALOX5   | ALOX5       | arachidonate 5-lipoxygenase                                                 | 109  | 1.093800068  | 0.46726263 | Yes         |
| row_2  | PLA2G4A | PLA2G4A     | phospholipase A2, group IVA (cytosolic, calcium-dependent)                  | 114  | 1.087199926  | 0.6273233  | Yes         |
| row_3  | PGDS    | PGDS        | -                                                                           | 818  | 0.437399864  | 0.5966792  | Yes         |
| row_4  | CBR1    | CBR1        | carbonyl reductase 1                                                        | 923  | 0.406199932  | 0.6425915  | Yes         |
| row_5  | PRDX6   | PRDX6       | peroxiredoxin 6                                                             | 1214 | 0.334999979  | 0.65278274 | Yes         |
| row_6  | PRDX2   | PRDX2       | peroxiredoxin 2                                                             | 3072 | 0.065700054  | 0.41086206 | No          |
| row_7  | CBR3    | CBR3        | carbonyl reductase 3                                                        | 3639 | 0.006500006  | 0.3351285  | No          |
| row_8  | PRDX5   | PRDX5       | peroxiredoxin 5                                                             | 3796 | -0.011299968 | 0.3156595  | No          |
| row_9  | PRDX1   | PRDX1       | peroxiredoxin 1                                                             | 4183 | -0.049299955 | 0.27063864 | No          |
| row_10 | TBXAS1  | TBXAS1      | thromboxane A synthase 1 (platelet, cytochrome P450, family 5, subfamily A) | 4363 | -0.06889987  | 0.25656188 | No          |
| row_11 | LTA4H   | LTA4H       | leukotriene A4 hydrolase                                                    | 4634 | -0.096500039 | 0.23423165 | No          |
| row_12 | PTGES2  | PTGES2      | prostaglandin E synthase 2                                                  | 4991 | -0.133599997 | 0.20572874 | No          |
| row_13 | CYP4F2  | CYP4F2      | cytochrome P450, family 4, subfamily F, polypeptide 2                       | 5513 | -0.19660002  | 0.16417457 | No          |
| row_14 | GGT1    | GGT1        | gamma-glutamyltransferase 1                                                 | 6142 | -0.293400049 | 0.12242118 | No          |
| row_15 | PLA2G1B | PLA2G1B     | phospholipase A2, group IB (pancreas)                                       | 6271 | -0.319700003 | 0.15230355 | No          |

#### Calcineurine NFAT Signaling

| NAME  | PROBE | GENE SYMBOL | GENE_TITLE                                            | RANK | METRIC SCORE | RUNNING ES | CORE ENRICH |
|-------|-------|-------------|-------------------------------------------------------|------|--------------|------------|-------------|
| row_0 | EGR2  | EGR2        | early growth response 2 (Krox-20 homolog, Drosophila) | 23   | 1.801800251  | 0.10368311 | Yes         |
| row_1 | IL2RA | IL2RA       | interleukin 2 receptor, alpha                         | 28   | 1.689100266  | 0.20326997 | Yes         |



|        |         |         |                                                                                         |      |              |            |     |
|--------|---------|---------|-----------------------------------------------------------------------------------------|------|--------------|------------|-----|
| row_2  | IL10    | IL10    | interleukin 10                                                                          | 72   | 1.297500134  | 0.2743371  | Yes |
| row_3  | EGR3    | EGR3    | early growth response 3                                                                 | 157  | 0.973499775  | 0.32061982 | Yes |
| row_4  | FKBP1B  | FKBP1B  | FK506 binding protein 1B, 12.6 kDa                                                      | 181  | 0.91989994   | 0.37202328 | Yes |
| row_5  | FOSL1   | FOSL1   | FOS-like antigen 1                                                                      | 218  | 0.838699996  | 0.4168447  | Yes |
| row_6  | IFNG    | IFNG    | interferon, gamma                                                                       | 290  | 0.740600109  | 0.4510894  | Yes |
| row_7  | CD69    | CD69    | CD69 molecule                                                                           | 330  | 0.704599857  | 0.48755315 | Yes |
| row_8  | CSF2    | CSF2    | colony stimulating factor 2 (granulocyte-macrophage)                                    | 532  | 0.561500072  | 0.49349603 | Yes |
| row_9  | FOS     | FOS     | v-fos FBJ murine osteosarcoma viral oncogene homolog                                    | 980  | 0.389800072  | 0.4557956  | Yes |
| row_10 | JUNB    | JUNB    | jun B proto-oncogene                                                                    | 984  | 0.389300108  | 0.47846547 | Yes |
| row_11 | PPP3CC  | PPP3CC  | protein phosphatase 3 (formerly 2B), catalytic subunit, gamma isoform (calcineurin A    | 1111 | 0.359199941  | 0.48261854 | Yes |
| row_12 | MAPK14  | MAPK14  | mitogen-activated protein kinase 14                                                     | 1152 | 0.348599911  | 0.49784234 | Yes |
| row_13 | PTPRC   | PTPRC   | protein tyrosine phosphatase, receptor type, C                                          | 1469 | 0.285300016  | 0.47176778 | No  |
| row_14 | PPP3CB  | PPP3CB  | protein phosphatase 3 (formerly 2B), catalytic subunit, beta isoform (calcineurin A bet | 1535 | 0.275099993  | 0.47923356 | No  |
| row_15 | IL13    | IL13    | interleukin 13                                                                          | 2027 | 0.195899963  | 0.424053   | No  |
| row_16 | MEF2B   | MEF2B   | MADS box transcription enhancer factor 2, polypeptide B (myocyte enhancer factor 2)     | 2189 | 0.173300028  | 0.41242456 | No  |
| row_17 | P2RX7   | P2RX7   | purinergic receptor P2X, ligand-gated ion channel, 7                                    | 2327 | 0.154700041  | 0.40295836 | No  |
| row_18 | VEGF    | VEGF    | vascular endothelial growth factor                                                      | 2415 | 0.144899845  | 0.399713   | No  |
| row_19 | PPP3R1  | PPP3R1  | protein phosphatase 3 (formerly 2B), regulatory subunit B, 19kDa, alpha isoform (calc   | 2448 | 0.139400005  | 0.40362358 | No  |
| row_20 | CREBBP  | CREBBP  | CREB binding protein (Rubinstein-Taybi syndrome)                                        | 2460 | 0.137700081  | 0.41029012 | No  |
| row_21 | VAV3    | VAV3    | vav 3 oncogene                                                                          | 2539 | 0.127500057  | 0.40723762 | No  |
| row_22 | CEBPB   | CEBPB   | CCAAT/enhancer binding protein (C/EBP), beta                                            | 2822 | 0.094900131  | 0.37450123 | No  |
| row_23 | CSNK2B  | CSNK2B  | casein kinase 2, beta polypeptide                                                       | 2898 | 0.086300135  | 0.36941448 | No  |
| row_24 | NFKBIE  | NFKBIE  | nuclear factor of kappa light polypeptide gene enhancer in B-cells inhibitor, epsilon   | 2974 | 0.076799989  | 0.36376452 | No  |
| row_25 | CSNK2A1 | CSNK2A1 | casein kinase 2, alpha 1 polypeptide                                                    | 3202 | 0.052999973  | 0.33602625 | No  |
| row_26 | SP1     | SP1     | Sp1 transcription factor                                                                | 3475 | 0.024500012  | 0.30047688 | No  |
| row_27 | NFKBIB  | NFKBIB  | nuclear factor of kappa light polypeptide gene enhancer in B-cells inhibitor, beta      | 3695 | 0            | 0.270685   | No  |
| row_28 | XPO5    | XPO5    | exportin 5                                                                              | 3853 | -0.016000032 | 0.25027585 | No  |
| row_29 | IL2     | IL2     | interleukin 2                                                                           | 4049 | -0.035700083 | 0.22586517 | No  |
| row_30 | PIN1    | PIN1    | protein (peptidylprolyl cis/trans isomerase) NIMA-interacting 1                         | 4293 | -0.062100053 | 0.19648978 | No  |
| row_31 | MAPK8   | MAPK8   | mitogen-activated protein kinase 8                                                      | 4350 | -0.067499995 | 0.19287321 | No  |
| row_32 | NFATC2  | NFATC2  | nuclear factor of activated T-cells, cytoplasmic, calcineurin-dependent 2               | 4455 | -0.077300072 | 0.18330787 | No  |
| row_33 | NFATC3  | NFATC3  | nuclear factor of activated T-cells, cytoplasmic, calcineurin-dependent 3               | 4457 | -0.077499986 | 0.18776609 | No  |
| row_34 | PPIA    | PPIA    | peptidylprolyl isomerase A (cyclophilin A)                                              | 4606 | -0.093400002 | 0.1731696  | No  |
| row_35 | CAMK4   | CAMK4   | calcium/calmodulin-dependent protein kinase IV                                          | 4862 | -0.121500015 | 0.14568304 | No  |

|        |        |        |                                                                                 |      |              |              |    |
|--------|--------|--------|---------------------------------------------------------------------------------|------|--------------|--------------|----|
| row_36 | CALM3  | CALM3  | calmodulin 3 (phosphorylase kinase, delta)                                      | 4872 | -0.122799993 | 0.15173838   | No |
| row_37 | SP3    | SP3    | Sp3 transcription factor                                                        | 4979 | -0.132600069 | 0.1451792    | No |
| row_38 | IL4    | IL4    | interleukin 4                                                                   | 5734 | -0.229899883 | 0.056236733  | No |
| row_39 | BCL2   | BCL2   | B-cell CLL/lymphoma 2                                                           | 5779 | -0.234300137 | 0.064140625  | No |
| row_40 | IL6    | IL6    | interleukin 6 (interferon, beta 2)                                              | 6532 | -0.3829      | -0.015459816 | No |
| row_41 | CD3E   | CD3E   | CD3e molecule, epsilon (CD3-TCR complex)                                        | 6538 | -0.384499788 | 0.006653411  | No |
| row_42 | CABIN1 | CABIN1 | -                                                                               | 6699 | -0.425499976 | 0.01011159   | No |
| row_43 | MAP2K7 | MAP2K7 | mitogen-activated protein kinase kinase 7                                       | 7185 | -0.692299962 | -0.014825823 | No |
| row_44 | NFKB2  | NFKB2  | nuclear factor of kappa light polypeptide gene enhancer in B-cells 2 (p49/p100) | 7212 | -0.729699969 | 0.02489435   | No |

#### Alanine and Aspartate Metabolism

| NAME   | PROBE  | GENE SYMBOL | GENE_TITLE                                                                            | RANK | METRIC SCORE | RUNNING ES | CORE ENRICH |
|--------|--------|-------------|---------------------------------------------------------------------------------------|------|--------------|------------|-------------|
| row_0  | GPT2   | GPT2        | glutamic pyruvate transaminase (alanine aminotransferase) 2                           | 78   | 1.266599894  | 0.21730758 | Yes         |
| row_1  | GAD1   | GAD1        | glutamate decarboxylase 1 (brain, 67kDa)                                              | 305  | 0.727699995  | 0.31759968 | Yes         |
| row_2  | GOT2   | GOT2        | glutamic-oxaloacetic transaminase 2, mitochondrial (aspartate aminotransferase 2)     | 566  | 0.546499968  | 0.380683   | Yes         |
| row_3  | PDHA1  | PDHA1       | pyruvate dehydrogenase (lipoamide) alpha 1                                            | 713  | 0.474799991  | 0.4463178  | Yes         |
| row_4  | DLAT   | DLAT        | dihydrolipoamide S-acetyltransferase (E2 component of pyruvate dehydrogenase complex) | 817  | 0.4375       | 0.5110699  | Yes         |
| row_5  | ASRGL1 | ASRGL1      | asparaginase like 1                                                                   | 962  | 0.395099878  | 0.56263655 | Yes         |
| row_6  | GOT1   | GOT1        | glutamic-oxaloacetic transaminase 1, soluble (aspartate aminotransferase 1)           | 1096 | 0.36349988   | 0.6100089  | Yes         |
| row_7  | PDHB   | PDHB        | pyruvate dehydrogenase (lipoamide) beta                                               | 1766 | 0.237300038  | 0.5620276  | No          |
| row_8  | DARS2  | DARS2       | aspartyl-tRNA synthetase 2 (mitochondrial)                                            | 1951 | 0.208600044  | 0.57461876 | No          |
| row_9  | AARS   | AARS        | alanyl-tRNA synthetase                                                                | 3176 | 0.055399895  | 0.41868737 | No          |
| row_10 | ADSSL1 | ADSSL1      | adenylosuccinate synthase like 1                                                      | 3349 | 0.03670001   | 0.4019777  | No          |
| row_11 | ADSL   | ADSL        | adenylosuccinate lyase                                                                | 3922 | -0.022600055 | 0.32851598 | No          |
| row_12 | PC     | PC          | pyruvate carboxylase                                                                  | 4338 | -0.066399813 | 0.28421396 | No          |
| row_13 | ASL    | ASL         | argininosuccinate lyase                                                               | 4339 | -0.066400051 | 0.29616028 | No          |
| row_14 | GPT    | GPT         | glutamic-pyruvate transaminase (alanine aminotransferase)                             | 4794 | -0.114400029 | 0.2552082  | No          |
| row_15 | CAD    | CAD         | carbamoyl-phosphate synthetase 2, aspartate transcarbamylase, and dihydroorotase      | 4888 | -0.124199986 | 0.26494852 | No          |
| row_16 | CRAT   | CRAT        | carnitine acetyltransferase                                                           | 5487 | -0.193300009 | 0.2186742  | No          |
| row_17 | DARS   | DARS        | aspartyl-tRNA synthetase                                                              | 5668 | -0.221200049 | 0.23407441 | No          |

#### ATRBRC A Pathway

| NAME  | PROBE | GENE SYMBOL | GENE_TITLE                   | RANK | METRIC SCORE | RUNNING ES | CORE ENRICH |
|-------|-------|-------------|------------------------------|------|--------------|------------|-------------|
| row_0 | BRCA1 | BRCA1       | breast cancer 1, early onset | 441  | 0.621299744  | 0.06270369 | Yes         |

|        |        |        |                                                                            |      |              |            |     |
|--------|--------|--------|----------------------------------------------------------------------------|------|--------------|------------|-----|
| row_1  | BRCA2  | BRCA2  | breast cancer 2, early onset                                               | 585  | 0.53579998   | 0.14893456 | Yes |
| row_2  | FANCD2 | FANCD2 | Fanconi anemia, complementation group D2                                   | 615  | 0.521499872  | 0.24779399 | Yes |
| row_3  | FANCA  | FANCA  | Fanconi anemia, complementation group A                                    | 703  | 0.478200197  | 0.33025986 | Yes |
| row_4  | FANCE  | FANCE  | Fanconi anemia, complementation group E                                    | 824  | 0.43539989   | 0.39981815 | Yes |
| row_5  | CHEK2  | CHEK2  | CHK2 checkpoint homolog (S. pombe)                                         | 834  | 0.432800055  | 0.48390466 | Yes |
| row_6  | RAD51  | RAD51  | RAD51 homolog (RecA homolog, E. coli) (S. cerevisiae)                      | 950  | 0.39800024   | 0.54676884 | Yes |
| row_7  | MRE11A | MRE11A | MRE11 meiotic recombination 11 homolog A (S. cerevisiae)                   | 1258 | 0.324900031  | 0.56920856 | Yes |
| row_8  | CHEK1  | CHEK1  | CHK1 checkpoint homolog (S. pombe)                                         | 1320 | 0.312400103  | 0.6225179  | Yes |
| row_9  | RAD1   | RAD1   | RAD1 homolog (S. pombe)                                                    | 2878 | 0.08889997   | 0.4290647  | No  |
| row_10 | NBS1   | null   | null                                                                       | 3059 | 0.067000031  | 0.41788033 | No  |
| row_11 | FANCC  | FANCC  | Fanconi anemia, complementation group C                                    | 3517 | 0.019199967  | 0.35974056 | No  |
| row_12 | RAD50  | RAD50  | RAD50 homolog (S. cerevisiae)                                              | 4520 | -0.083499908 | 0.24042626 | No  |
| row_13 | TP53   | TP53   | tumor protein p53 (Li-Fraumeni syndrome)                                   | 5295 | -0.168499947 | 0.16875999 | No  |
| row_14 | FANCF  | FANCF  | Fanconi anemia, complementation group F                                    | 5322 | -0.171399951 | 0.19902033 | No  |
| row_15 | ATM    | ATM    | ataxia telangiectasia mutated (includes complementation groups A, C and D) | 6659 | -0.414699912 | 0.09972895 | No  |

#### Glutamate Metabolism

| NAME   | PROBE   | GENE SYMBOL | GENE_TITLE                                                                        | RANK | METRIC SCORE | RUNNING ES | CORE ENRICH |
|--------|---------|-------------|-----------------------------------------------------------------------------------|------|--------------|------------|-------------|
| row_0  | GPT2    | GPT2        | glutamic pyruvate transaminase (alanine aminotransferase) 2                       | 78   | 1.266599894  | 0.2175047  | Yes         |
| row_1  | GAD1    | GAD1        | glutamate decarboxylase 1 (brain, 67kDa)                                          | 305  | 0.727699995  | 0.31792003 | Yes         |
| row_2  | GMPS    | GMPS        | guanine monphosphate synthetase                                                   | 407  | 0.649100065  | 0.4211175  | Yes         |
| row_3  | GOT2    | GOT2        | glutamic-oxaloacetic transaminase 2, mitochondrial (aspartate aminotransferase 2) | 566  | 0.546499968  | 0.49811763 | Yes         |
| row_4  | GCLM    | GCLM        | glutamate-cysteine ligase, modifier subunit                                       | 933  | 0.402199984  | 0.52095366 | Yes         |
| row_5  | GCLC    | GCLC        | glutamate-cysteine ligase, catalytic subunit                                      | 1054 | 0.372400045  | 0.5717525  | Yes         |
| row_6  | GOT1    | GOT1        | glutamic-oxaloacetic transaminase 1, soluble (aspartate aminotransferase 1)       | 1096 | 0.36349988   | 0.6316519  | Yes         |
| row_7  | GSS     | GSS         | glutathione synthetase                                                            | 1474 | 0.284999967  | 0.63189375 | Yes         |
| row_8  | PPAT    | PPAT        | phosphoribosyl pyrophosphate amidotransferase                                     | 2413 | 0.145099998  | 0.5309384  | No          |
| row_9  | EPRS    | EPRS        | glutamyl-prolyl-tRNA synthetase                                                   | 3048 | 0.067900181  | 0.45726871 | No          |
| row_10 | GLS     | GLS         | glutaminase                                                                       | 3557 | 0.014800072  | 0.39110836 | No          |
| row_11 | GPT     | GPT         | glutamic-pyruvate transaminase (alanine aminotransferase)                         | 4794 | -0.114400029 | 0.244251   | No          |
| row_12 | CAD     | CAD         | carbamoyl-phosphate synthetase 2, aspartate transcarbamylase, and dihydroorotase  | 4888 | -0.124199986 | 0.25401536 | No          |
| row_13 | ALDH5A1 | ALDH5A1     | aldehyde dehydrogenase 5 family, member A1 (succinate-semialdehyde dehydrogenase) | 5731 | -0.229599953 | 0.18128195 | No          |
| row_14 | ALDH4A1 | ALDH4A1     | aldehyde dehydrogenase 4 family, member A1                                        | 5855 | -0.244499922 | 0.20864382 | No          |

**Cell Cycle KEGG**

| NAME   | PROBE  | GENE SYMBOL | GENE_TITLE                                                                          | RANK | METRIC SCORE | RUNNING ES  | CORE ENRICH |
|--------|--------|-------------|-------------------------------------------------------------------------------------|------|--------------|-------------|-------------|
| row_0  | CCND2  | CCND2       | cyclin D2                                                                           | 253  | 0.773299932  | 0.00906201  | Yes         |
| row_1  | CDC25C | CDC25C      | cell division cycle 25C                                                             | 369  | 0.673199654  | 0.031288303 | Yes         |
| row_2  | CCNB2  | CCNB2       | cyclin B2                                                                           | 388  | 0.661200047  | 0.066052645 | Yes         |
| row_3  | CDC6   | CDC6        | CDC6 cell division cycle 6 homolog (S. cerevisiae)                                  | 460  | 0.608300209  | 0.090619735 | Yes         |
| row_4  | E2F2   | E2F2        | E2F transcription factor 2                                                          | 487  | 0.584899902  | 0.11999968  | Yes         |
| row_5  | BUB1   | BUB1        | BUB1 budding uninhibited by benzimidazoles 1 homolog (yeast)                        | 499  | 0.579499722  | 0.15111898  | Yes         |
| row_6  | CCNB1  | CCNB1       | cyclin B1                                                                           | 628  | 0.516300201  | 0.16274315  | Yes         |
| row_7  | CCNA2  | CCNA2       | cyclin A2                                                                           | 690  | 0.483500004  | 0.18164794  | Yes         |
| row_8  | PTTG2  | PTTG2       | pituitary tumor-transforming 2                                                      | 718  | 0.473399639  | 0.20461576  | Yes         |
| row_9  | CDC45L | CDC45L      | CDC45 cell division cycle 45-like (S. cerevisiae)                                   | 720  | 0.473199844  | 0.23111407  | Yes         |
| row_10 | CCNE1  | CCNE1       | cyclin E1                                                                           | 732  | 0.466600006  | 0.25587872  | Yes         |
| row_11 | CDC2   | CDC2        | cell division cycle 2, G1 to S and G2 to M                                          | 747  | 0.459700108  | 0.2798463   | Yes         |
| row_12 | BUB1B  | BUB1B       | BUB1 budding uninhibited by benzimidazoles 1 homolog beta (yeast)                   | 793  | 0.443899632  | 0.29870167  | Yes         |
| row_13 | CHEK2  | CHEK2       | CHK2 checkpoint homolog (S. pombe)                                                  | 834  | 0.432800055  | 0.31761342  | Yes         |
| row_14 | BUB3   | BUB3        | BUB3 budding uninhibited by benzimidazoles 3 homolog (yeast)                        | 846  | 0.429499984  | 0.34028986  | Yes         |
| row_15 | MCM4   | MCM4        | MCM4 minichromosome maintenance deficient 4 (S. cerevisiae)                         | 947  | 0.398399983  | 0.34909207  | Yes         |
| row_16 | PLK1   | PLK1        | polo-like kinase 1 (Drosophila)                                                     | 952  | 0.397500038  | 0.37092087  | Yes         |
| row_17 | ORC6L  | ORC6L       | origin recognition complex, subunit 6 like (yeast)                                  | 955  | 0.396399975  | 0.39296022  | Yes         |
| row_18 | CDC20  | CDC20       | CDC20 cell division cycle 20 homolog (S. cerevisiae)                                | 1021 | 0.379300117  | 0.40545514  | Yes         |
| row_19 | E2F1   | E2F1        | E2F transcription factor 1                                                          | 1132 | 0.352799892  | 0.4103285   | Yes         |
| row_20 | CDC25A | CDC25A      | cell division cycle 25A                                                             | 1168 | 0.344900131  | 0.42497382  | Yes         |
| row_21 | CHEK1  | CHEK1       | CHK1 checkpoint homolog (S. pombe)                                                  | 1320 | 0.312400103  | 0.42198816  | Yes         |
| row_22 | PTTG1  | PTTG1       | pituitary tumor-transforming 1                                                      | 1322 | 0.312299728  | 0.43943006  | Yes         |
| row_23 | RB1    | RB1         | retinoblastoma 1 (including osteosarcoma)                                           | 1342 | 0.310000062  | 0.45429054  | Yes         |
| row_24 | CDK2   | CDK2        | cyclin-dependent kinase 2                                                           | 1387 | 0.300500035  | 0.46521074  | Yes         |
| row_25 | CDC7   | CDC7        | CDC7 cell division cycle 7 (S. cerevisiae)                                          | 1529 | 0.276799917  | 0.46158352  | Yes         |
| row_26 | MAD2L1 | MAD2L1      | MAD2 mitotic arrest deficient-like 1 (yeast)                                        | 1686 | 0.248500109  | 0.4543201   | Yes         |
| row_27 | PCNA   | PCNA        | proliferating cell nuclear antigen                                                  | 1825 | 0.227400064  | 0.448321    | Yes         |
| row_28 | MCM2   | MCM2        | MCM2 minichromosome maintenance deficient 2, mitotin (S. cerevisiae)                | 1854 | 0.222599983  | 0.45703608  | Yes         |
| row_29 | MDM2   | MDM2        | Mdm2, transformed 3T3 cell double minute 2, p53 binding protein (mouse)             | 1864 | 0.22179997   | 0.46829432  | Yes         |
| row_30 | MCM6   | MCM6        | MCM6 minichromosome maintenance deficient 6 (MIS5 homolog, S. pombe) (S. cere       | 2128 | 0.183300018  | 0.44278538  | No          |
| row_31 | MCM5   | MCM5        | MCM5 minichromosome maintenance deficient 5, cell division cycle 46 (S. cerevisiae) | 2295 | 0.159100056  | 0.42912775  | No          |

|        |         |         |                                                                            |      |              |              |    |
|--------|---------|---------|----------------------------------------------------------------------------|------|--------------|--------------|----|
| row_32 | ESPL1   | ESPL1   | extra spindle poles like 1 ( <i>S. cerevisiae</i> )                        | 2473 | 0.136000156  | 0.4126715    | No |
| row_33 | ORC1L   | ORC1L   | origin recognition complex, subunit 1-like (yeast)                         | 2518 | 0.130399942  | 0.41401747   | No |
| row_34 | HDAC4   | HDAC4   | histone deacetylase 4                                                      | 2561 | 0.124500036  | 0.4153038    | No |
| row_35 | CDC25B  | CDC25B  | cell division cycle 25B                                                    | 2722 | 0.105400085  | 0.39944094   | No |
| row_36 | E2F6    | E2F6    | E2F transcription factor 6                                                 | 2726 | 0.10529995   | 0.4049592    | No |
| row_37 | MCM3    | MCM3    | MCM3 minichromosome maintenance deficient 3 ( <i>S. cerevisiae</i> )       | 2750 | 0.10289979   | 0.40761796   | No |
| row_38 | HDAC5   | HDAC5   | histone deacetylase 5                                                      | 3504 | 0.021100044  | 0.306231     | No |
| row_39 | ORC4L   | ORC4L   | origin recognition complex, subunit 4-like (yeast)                         | 4031 | -0.034100056 | 0.236498     | No |
| row_40 | HDAC8   | HDAC8   | histone deacetylase 8                                                      | 4163 | -0.047199965 | 0.2213097    | No |
| row_41 | WEE1    | WEE1    | WEE1 homolog ( <i>S. pombe</i> )                                           | 4284 | -0.061100006 | 0.20840225   | No |
| row_42 | SMC1L1  | null    | null                                                                       | 4444 | -0.076400042 | 0.19104332   | No |
| row_43 | ORC2L   | ORC2L   | origin recognition complex, subunit 2-like (yeast)                         | 4497 | -0.081200004 | 0.18853025   | No |
| row_44 | HDAC1   | HDAC1   | histone deacetylase 1                                                      | 4620 | -0.095499992 | 0.17728657   | No |
| row_45 | CDK4    | CDK4    | cyclin-dependent kinase 4                                                  | 4976 | -0.132500172 | 0.13638595   | No |
| row_46 | TFDP1   | TFDP1   | transcription factor Dp-1                                                  | 5119 | -0.149300098 | 0.12544604   | No |
| row_47 | TP53    | TP53    | tumor protein p53 (Li-Fraumeni syndrome)                                   | 5295 | -0.168499947 | 0.111091524  | No |
| row_48 | PRKDC   | PRKDC   | protein kinase, DNA-activated, catalytic polypeptide                       | 5603 | -0.210200071 | 0.08110293   | No |
| row_49 | GADD45A | GADD45A | growth arrest and DNA-damage-inducible, alpha                              | 5608 | -0.211300135 | 0.09245129   | No |
| row_50 | CCNE2   | CCNE2   | cyclin E2                                                                  | 5964 | -0.260299921 | 0.058744006  | No |
| row_51 | CDC14A  | CDC14A  | CDC14 cell division cycle 14 homolog A ( <i>S. cerevisiae</i> )            | 6652 | -0.413300037 | -0.011576954 | No |
| row_52 | ATM     | ATM     | ataxia telangiectasia mutated (includes complementation groups A, C and D) | 6659 | -0.414699912 | 0.010947528  | No |
| row_53 | MAD1L1  | MAD1L1  | MAD1 mitotic arrest deficient-like 1 (yeast)                               | 7101 | -0.617699981 | -0.014358153 | No |
| row_54 | CDKN2A  | CDKN2A  | cyclin-dependent kinase inhibitor 2A (melanoma, p16, inhibits CDK4)        | 7316 | -0.96420002  | 0.010761493  | No |

#### GPCR DB

| NAME  | PROBE | GENE SYMBOL | GENE_TITLE                                                  | RANK | METRIC SCORE | RUNNING ES | CORE ENRICH |
|-------|-------|-------------|-------------------------------------------------------------|------|--------------|------------|-------------|
| row_0 | GPR56 | GPR56       | G protein-coupled receptor 56                               | 14   | 1.989099979  | 0.28498083 | Yes         |
| row_1 | CCR5  | CCR5        | chemokine (C-C motif) receptor 5                            | 266  | 0.76279974   | 0.36097574 | Yes         |
| row_2 | LPHN2 | LPHN2       | latrophilin 2                                               | 297  | 0.732099891  | 0.46249688 | Yes         |
| row_3 | CXCR3 | CXCR3       | chemokine (C-X-C motif) receptor 3                          | 457  | 0.610599995  | 0.52901024 | Yes         |
| row_4 | CCR3  | CCR3        | chemokine (C-C motif) receptor 3                            | 909  | 0.411400318  | 0.52721685 | Yes         |
| row_5 | LGR6  | LGR6        | leucine-rich repeat-containing G protein-coupled receptor 6 | 996  | 0.387300014  | 0.571419   | Yes         |
| row_6 | F2R   | F2R         | coagulation factor II (thrombin) receptor                   | 1543 | 0.274299979  | 0.5369762  | Yes         |
| row_7 | CCR2  | CCR2        | chemokine (C-C motif) receptor 2                            | 1550 | 0.27270031   | 0.5754932  | Yes         |

|        |        |        |                                                                                    |      |              |               |
|--------|--------|--------|------------------------------------------------------------------------------------|------|--------------|---------------|
| row_8  | GPR17  | GPR17  | G protein-coupled receptor 17                                                      | 2226 | 0.168500066  | 0.508307 No   |
| row_9  | EDG1   | EDG1   | endothelial differentiation, sphingolipid G-protein-coupled receptor, 1            | 3332 | 0.038999915  | 0.36416218 No |
| row_10 | LTB4R2 | LTB4R2 | leukotriene B4 receptor 2                                                          | 3924 | -0.023000002 | 0.28737637 No |
| row_11 | GPR135 | GPR135 | G protein-coupled receptor 135                                                     | 4298 | -0.0625      | 0.24583474 No |
| row_12 | EBI2   | EBI2   | Epstein-Barr virus induced gene 2 (lymphocyte-specific G protein-coupled receptor) | 4860 | -0.121200085 | 0.18727799 No |
| row_13 | CIDEB  | CIDEB  | cell death-inducing DFFA-like effector b                                           | 5028 | -0.137899876 | 0.18453176 No |
| row_14 | EMR3   | EMR3   | egf-like module containing, mucin-like, hormone receptor-like 3                    | 5645 | -0.217899978 | 0.13246697 No |
| row_15 | GPR132 | GPR132 | G protein-coupled receptor 132                                                     | 5713 | -0.227099985 | 0.15613948 No |
| row_16 | P2RY11 | P2RY11 | purinergic receptor P2Y, G-protein coupled, 11                                     | 5780 | -0.234499931 | 0.18101476 No |
| row_17 | RLN3R1 | null   | null                                                                               | 5974 | -0.261700034 | 0.19259965 No |
